1 **TITLE**

2 **ASCL1 regulates neurodevelopmental transcription factors and cell cycle genes in**  
3 **glioblastoma**

4  
5 **RUNNING TITLE**

6 **ASCL1 regulation of glioblastoma development**

7  
8 **AUTHORS AND AFFILIATIONS**

9 Tou Yia Vue<sup>1,7,\*</sup>, Rahul K. Kollipara<sup>2</sup>, Mark D. Borromeo<sup>1</sup>, Tyler Smith<sup>1</sup>, Tomoyuki Mashimo<sup>3,4</sup>,  
10 Dennis K. Burns<sup>5</sup>, Robert M. Bachoo<sup>3,4</sup>, and Jane E. Johnson<sup>1,6</sup>

11 <sup>1</sup>Department of Neuroscience, <sup>2</sup>McDermott Center for Human Growth and Development,  
12 <sup>3</sup>Department of Neurology and Neurotherapeutics, <sup>4</sup>Department of Internal Medicine,  
13 <sup>5</sup>Department of Pathology, and <sup>6</sup>Department of Pharmacology at the University of Texas  
14 Southwestern Medical Center, Dallas, TX, 75390, USA.

15 <sup>7</sup>Current address: Department of Neurosciences, University of New Mexico, Albuquerque, NM  
16 87131, USA. \*corresponding author: [TVue@salud.UNM.edu](mailto:TVue@salud.UNM.edu)

17  
18 **Author Contributions:** T.Y.V performed experiments with assistance from M.D.B. and T.S., and  
19 prepared all the figures; R.K.K. performed bioinformatic and statistical analyses; D.K.B performed  
20 histological analysis of brain tumors; T.M. and R.M.B. generated and provided PDX-GBM mice;  
21 T.Y.V and J.E.J. designed the study, analyzed all data, and wrote the manuscript. All authors  
22 provided scientific insights and edited the manuscript.

23  
24 **ACKNOWLEDGEMENTS**

25 We acknowledge Lauren K. Tyra, Erin Kibodeaux, Juan Villareal, and Trisha Savage for excellent  
26 mouse genotyping and husbandry. We thank Dr. Francois Guillemot for *Ascl1<sup>fllox</sup>* mice and Dr.

27 Luis F. Parada for *Nf1<sup>flox</sup>;Trp53<sup>flox</sup>* mice, the Histo Pathology Core for performing H&E staining of  
28 brain tumor tissues, and members of the J.E.J laboratory for helpful discussions throughout this  
29 study. This research was supported by the National Institutes of Health (NIH) R01 NS032817 and  
30 CPRIT RP130464 to J.E.J, and NIH F32 CA168330 and K22 NS092767 to T.Y.V. This research  
31 was also partially supported by UNM Comprehensive Cancer Center Support Grant NCI  
32 P30CA118100 and made use of the Fluorescence Microscopy and Cell Imaging shared resource.

33

### 34 CONFLICT OF INTERESTS

35 The authors declare no potential conflict of interest.

36

### 37 MANUSCRIPT INFORMATION

#### 38 **Word Counts**

39 Title Page: **219**

40 Abstract: **186**

41 Introduction: **493**

42 Materials and Methods: **1,209**

43 Results: **3,096**

44 Discussion: **1,272**

45 Figure Legends: **1,306**

46 Number of Figures: **6**

47 Number of Supplementary Figures: **1**

48 Number of Supplementary Tables: **5**

49

### 50 ABSTRACT

51 Glioblastomas (GBMs) are incurable brain tumors with a high degree of cellular  
52 heterogeneity and genetic mutations. Transcription factors that normally regulate neural

53 progenitors and glial development are aberrantly co-expressed in GBM, conferring cancer stem-  
54 like properties to drive tumor progression and therapeutic resistance. However, the functional role  
55 of individual transcription factors in GBMs *in vivo* remains elusive. Here, we demonstrate that the  
56 basic-helix-loop-helix (bHLH) transcription factor ASCL1 regulates transcriptional targets that are  
57 central to GBM development, including neural stem cell and glial transcription factors, oncogenic  
58 signaling molecules, chromatin modifying genes, and cell cycle and mitotic genes. We also show  
59 that the loss of ASCL1 significantly reduces the proliferation of GBMs induced in the brain of a  
60 genetically relevant glioma mouse model, resulting in extended survival times. RNA-seq analysis  
61 of mouse GBM tumors reveal that the loss of ASCL1 is associated with downregulation of cell  
62 cycle genes, illustrating an important role for ASCL1 in controlling the proliferation of GBM.

63  
64 **KEY WORDS:** ASCL1, transcription factor function, glioma development, brain tumor, mouse  
65 model

66  
67 **TABLE OF CONTENTS:**

68 **Main Points:**

- 69
- 70 • ASCL1 is co-expressed with neural stem cell/glial transcription factors in GBM
  - 71 • ASCL1 binds to genes that are important for cell proliferation and cancer in the brain.
  - 72 • Loss of ASCL1 downregulates cell cycle genes and increase survival of glioma mouse model.

73 **Table of Content Image:**

74  
75  
76

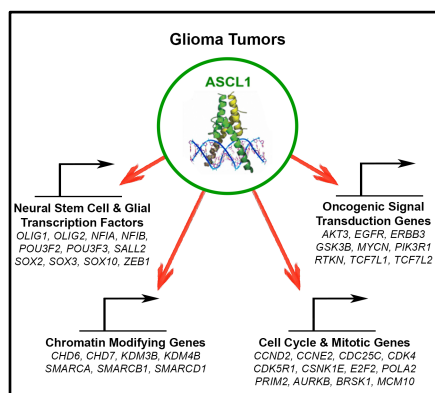

## 77 INTRODUCTION

78 Glioblastomas (GBMs) are incurable brain tumors most commonly found in adults. Despite  
79 significant advances in imaging and surgical resection techniques combined with aggressive  
80 radiotherapy and chemotherapy, the median survival for GBM patients remains stagnated  
81 between 14-16 months, with greater than 90% of patients succumbing to their disease within 5  
82 years of diagnosis (Ostrom et al., 2016). A major reason for this poor prognosis is due to the high  
83 degree of heterogeneity and plasticity of these neoplasms, and the lack of mechanistic insights  
84 into the pan-therapeutic resistance of GBM tumor cells (Babu et al., 2016; Brennan et al., 2013;  
85 Lathia, Heddleston, Venere, & Rich, 2011b).

86 Concerted sequencing efforts from the Cancer Genome Atlas (TCGA) Research Network  
87 revealed a complex somatic landscape for GBMs involving oncogenes (*BRAF*, *EGFR*, *PDGFR $\alpha$* ,  
88 *MET*, *PIK3C*, *MYCN*), tumor suppressor genes (*CDNK2A/B*, *PTEN*, *NF1*, *RB1*) and chromatin  
89 modifying genes, which converge to activate signaling pathways (pAKT, Ras/MAPK, STAT) to  
90 promote tumor proliferation and growth (2008; Brennan et al., 2009; Brennan et al., 2013; Verhaak  
91 et al., 2010). Emerging evidence also suggests that a cellular hierarchy may exist within the  
92 heterogeneous GBM tumor composition, where a subpopulation of quiescent cancer stem-like  
93 cells, or glioma-stem-cells (GSCs), are postulated to be responsible for driving tumor growth,  
94 progression, and the development of resistance to therapeutic treatments (Bao et al., 2006; Chen  
95 et al., 2012; Lan et al., 2017; Lathia et al., 2011b; Lathia et al., 2011a; Parada, Dirks, & Wechsler-  
96 Reya, 2017).

97 Despite displaying an aberrant array of mutations, GSCs are universally marked by co-  
98 expression of a combination of transcription factors, some of which include ASCL1, NFIA,  
99 NKX2.2, OLIG2, POU3F2, SALL2, SOX2, and ZEB1 (Glasgow et al., 2017; Lu et al., 2016;  
100 Rheinbay et al., 2013; Singh et al., 2017; Suva et al., 2014). These transcription factors have  
101 been extensively studied in the developing central nervous system (CNS), where each has been  
102 shown to regulate the fate, proliferation and/or migration of neural progenitor and glial precursor

103 cells in stage specific processes. In the context of gliomas, these transcription factors are often  
104 constitutively co-expressed and have been shown to function in a combinatorial manner in  
105 determining the tumorigenicity and differentiation status of tumor cells (Gangemi et al., 2009;  
106 Ligon et al., 2007; Rheinbay et al., 2013; Singh et al., 2017; Suva et al., 2014).

107 In this study, we focus on ASCL1, a class II basic-helix-loop-helix (bHLH) transcription  
108 factor that forms a heterodimer with class I bHLH E-proteins (such as E47/TCF3) to activate  
109 specific target genes (Kageyama, Ohtsuka, Hatakeyama, & Ohsawa, 2005). During  
110 embryogenesis, ASCL1 is expressed in specific populations of neural progenitor domains and  
111 glial precursor cells throughout the neural tube from the spinal cord to the brain (Helms et al.,  
112 2005; Parras et al., 2004; Parras et al., 2007; Sugimori et al., 2007; Sugimori et al., 2008; Vue,  
113 Kim, Parras, Guillemot, & Johnson, 2014), including in neurogenic regions of the adult brain (Kim,  
114 Leung, Reed, & Johnson, 2007; Kim, Ables, Dickel, Eisch, & Johnson, 2011). Recently, ASCL1  
115 was shown to be capable of reorganizing and promoting the accessibility of closed chromatin in  
116 embryonic stem cells as well as glioma cell lines (Casey, Kollipara, Pozo, & Johnson, 2018;  
117 Raposo et al., 2015). Not surprisingly, genome wide profiling revealed a critical role for ASCL1 in  
118 interacting with both Wnt and Notch signaling pathways to control the tumorigenicity of glioma  
119 cells in culture (Park et al., 2017; Rheinbay et al., 2013). To date however, whether ASCL1 is  
120 absolutely required for glioma tumor development in the brain as it has been shown for a mouse  
121 model of small-cell-lung-carcinoma (SCLC) (Borromeo et al., 2016) remains to be determined.  
122 Here, we sought to identify the direct *in vivo* role and transcriptional targets of ASCL1 in brain  
123 tumors of previously characterized patient-derived-xenograft (PDX)-GBM and genetically  
124 engineered glioma mouse models.

125

## 126 [MATERIALS AND METHODS](#)

### 127 **Glioma Mouse Models**

128 Patient-derived-xenograft (PDX) GBM (R738 and R548) were passaged orthotopically in  
129 the brains of NOD-SCID mice as previously described (Marian et al., 2010; Marin-Valencia et al.,  
130 2012). Generation and genotyping of mouse strains used to generate the glioma models were as  
131 previously reported: *Glast*<sup>CreERT2</sup> knock-in (Mori et al., 2006); *Ascl1*<sup>GFP</sup> knock-in [*Ascl1*<sup>tm1Reed/J</sup>  
132 012881] (Kim et al., 2007); *Ascl1*<sup>F</sup> [*Ascl1*-floxed] (Andersen et al., 2014; Pacary et al., 2011); *Nf1*<sup>F</sup>  
133 [*Nf1*<sup>tm1Par/J</sup> 017639] (Zhu et al., 2001); *p53*<sup>F</sup> [p53-floxed] (Lin et al., 2004); and the Cre reporter  
134 lines *R26R*<sup>LSL-YFP</sup> [*Gt(ROSA)26Sor*<sup>tm1(EYFP)Cos/J</sup> 006148] (Srinivas et al., 2001) and *R26R*<sup>LSL-tdTOM</sup>  
135 [*Gt(ROSA)26Sortm*<sup>14(CAG-tdTomato)Hze/J</sup> 013731] (Madisen et al., 2010). All animal procedures  
136 followed NIH guidelines and were approved by the UT Southwestern Institutional Animal Care  
137 and Use Committee.

138

### 139 **Mouse Breeding and Tamoxifen Administration**

140 The appearance of a vaginal plug was considered embryonic day (E) 0.5 and the day of  
141 birth was noted as postnatal day (P)0. To induce tumor formation in the brains of  
142 *Glast*<sup>CreERT2/+</sup>; *Nf1*<sup>F/F</sup>; *Trp53*<sup>F/F</sup> mice, tamoxifen (Sigma T5648, dissolved in 10% ethanol/90%  
143 sunflower oil) was administered intraperitoneally (62.5 mg/kg body weight) to pregnant females  
144 at E14.5. Due to the effects of tamoxifen on birth complications, cesarean section was performed  
145 and pups were carefully introduced and raised by a foster female.

146

### 147 **Tissue preparation, H&E staining, and Immunofluorescence**

148 Tumor bearing mice were trans-cardiac-perfused with 4% PFA in PBS. Brains were  
149 submerged in 30% sucrose/PBS at 4°C, and embedded in O.C.T. for cryosectioning. H&E staining  
150 of tumors was done by the UT Southwestern Histopathology Core. Grading of brain tumors was  
151 determined by a board certified neuropathologist.

152 For immunohistochemistry, tissue sections were incubated with primary antibody in 1%  
153 goat or donkey serum/0.3% Triton X-100/PBS overnight, followed by incubation with secondary

154 antibody conjugated with Alexa Fluor 488, 568 or 647 (Molecular Probes), and coverslipped with  
155 Vectashield (#101098-042) for confocal microscopy (LSM 510 & 720). The following antibodies  
156 were used:

| <b>Primary Antibodies</b>      | <b>Source &amp; Catalogue Number</b> | <b>Dilution</b>    |
|--------------------------------|--------------------------------------|--------------------|
| Chicken Anti-GFP               | Chemicon, AB16901                    | 1:500              |
| Goat Anti-SOX10                | R&D Systems, AF2864                  | 1:20               |
| Guinea Pig Anti-ASCL1          | Kim et al., 2008, TX518              | 1:1,000 – 1:10,000 |
| Mouse Anti-GFAP                | Sigma, G3893                         | 1:500              |
| Mouse Anti-MBP                 | Calbiochem, NE1019                   | 1:300              |
| Mouse Anti-NEUN                | Chemicon, MAB377                     | 1:1,000            |
| Rabbit Anti-Ki67               | Abcam, ab15580                       | 1:500              |
| Rabbit Anti-OLIG2              | Millipore, AB9610                    | 1:1,000            |
| Rabbit Anti-SOX2               | Millipore, AB5603                    | 1:1,000            |
| Rat Anti-PDGFR $\alpha$ (APA5) | BD Pharmingen, 558774                | 1:100              |

157

## 158 **ChIP-seq, RNA-seq, and Data Analysis**

159 Two independent ASCL1 ChIP-seq experiments were performed using PDX-GBMs (R548  
160 and R738) dissected from brains of NOD-SCID mice exhibiting symptoms of the presence of  
161 tumor. Briefly, as previously described (Borromeo et al., 2016), tumor tissues were homogenized  
162 and fixed in 1% formaldehyde to crosslink proteins and DNA, followed by quenching with 0.125  
163 M of glycine. Nuclear chromatin was pelleted, washed with cold PBS, and sonicated into 200-  
164 300bp fragments using a Biorupter (Diagenode). A 10% portion of the sheared chromatin was set  
165 aside as input DNA. Approximately 100 $\mu$ g was subjected to immunoprecipitation using ~5  $\mu$ g of  
166 mouse anti-ASCL1 (Mash1) antibody (BD Biosciences, 556604). Washes and reverse-  
167 crosslinking were performed using Dynabeads Protein G to elute ChIP DNA.

168 For RNA-seq experiments, the brain tumors were carefully dissected to enrich for tumor  
169 tissues and total RNA was extracted using a Direct-zol RNA MiniPrep Kit (Zymo Research). RNA  
170 integrity number (RIN) for all tumors was determined to be between 8-10 using a Bioagilent  
171 Analyzer. ChIP DNA and input DNA from PDX-GBMs and total RNAs from mouse brain tumors  
172 were sent for library preparation and sequencing on an Illumina High-Seq 2000 at the UT  
173 Southwestern Next Generation Sequencing Core.

174 To analyze ASCL1 ChIP-seq data, sequence reads were aligned to the human reference  
175 genome (hg19) using bowtie2 (v.2.2.6) (Langmead & Salzberg, 2012). Low-quality reads and  
176 duplicate reads were removed from aligned files using “samtools view -bh-F 0 × 04 -q 10” (v1.2)  
177 (Li, 2011) and “Picard MarkDuplicates.jar” (v. 1.131) commands (Picard 2018, Broad Institute,  
178 GitHub repository). The ChIP-seq signal enriched regions were identified using the “findPeaks”  
179 module available in HOMER software (v.4.7) (Heinz et al., 2010). The ChIP-seq signal shown in  
180 UCSC browser tracks are normalized read counts. *De novo* motif discovery and analysis were  
181 performed using “findMotifsGenome” module available in HOMER software (v.4.7). A 150 bp  
182 region around the peak summit was used to identify the primary binding motif and other potential  
183 DNA-binding co-Lanfactor motifs.

184 To analyze mouse tumor RNA-seq data, sequenced reads were aligned to the mouse  
185 mm10 genome using TopHat 2.1.0 (Kim et al., 2013). Default settings were used, with the  
186 exception of -G, specifying assembly to the mm10 genome, --library-type fr -first strand, and -  
187 no-novel-juncs, which disregards noncanonical splice junctions when defining alignments.  
188 DESeq2 (Love, Huber, & Anders, 2014) was used to incorporate RNA-seq data from the five  
189 biological replicates for *Ascl1*<sup>WT</sup> and *Ascl1*<sup>CKO</sup> tumor samples, and differentially expressed genes  
190 were identified using default parameters.

191 To investigate the similarity/difference between *Ascl1*<sup>WT</sup> and *Ascl1*<sup>CKO</sup> tumors in  
192 comparison to each other and to CNS cell types, multidimensional scaling (MDS) was performed  
193 using the plotMDS function available in edgeR package (Robinson, McCarthy, & Smyth, 2010).



194 Finally, to identify enrichment of gene signature sets in rank ordered gene lists obtained from  
195 *Ascl1*<sup>WT</sup> and *Ascl1*<sup>CKO</sup> tumor samples, gene set enrichment analysis (GSEA) (Subramanian et al.,  
196 2005) was performed and the signal-to-noise ratio metric was used to rank the genes.

197

## 198 **GBM Subtype Classification and Heatmap Clustering Analyses**

199 The GBM subtype signatures defined by Verhaak et al. (Verhaak et al., 2010) were used  
200 for hierarchical clustering for 164 GBM patient samples and 5 normal brains from TCGA for which  
201 RNA-seq data was available (2008; Brennan et al., 2009; Brennan et al., 2013; Verhaak et al.,  
202 2010). Spearman rank order correlation and ward.D2 clustering method were applied to identify  
203 the various GBM subtypes. Heatmaps were generated using absolute expression values (RPKM)  
204 for the selected list of genes or significantly changed genes, and hierarchical clustering was  
205 performed using the correlation distance metric and the ward.D2 method using the heatmap.2  
206 function available in the *gplots* R package.

207

## 208 **Gene Targets and Pathway Enrichment Analysis**

209 To identify ASCL1 putative targets, genes associated with the ASCL1 ChIP-seq peaks  
210 were annotated using GREAT v3.0.0 (<http://great.stanford.edu/public/html/>) (McLean et al.,  
211 2010), which was then cross-referenced with the top 10% of genes (2,136) whose expression  
212 positively correlates with ASCL1 expression by computing the Spearman rank order correlation  
213 (>0.4) using RNA-seq of TCGA GBM expression data. An overlap of 1,106 genes was identified  
214 as ASCL1 putative target genes. These genes were then subjected to pathway enrichment  
215 analysis performed using ConsensusPathDB (<http://cpdb.molgen.mpg.de/>) (Herwig, Hardt,  
216 Lienhard, & Kamburov, 2016). Relevant significantly enriched overrepresented gene sets (FDR ≤  
217 5%) were selected for illustration.

218

## 219 **Quantification of ASCL1+, OLIG2+, SOX2+ and Ki67+ Tumor Cells**

220 The number of DAPI+ tumor cells that were ASCL1+ along with each of the various  
221 markers were quantified using Image J on 20X immunofluorescence confocal images of both  
222 R548 and R738 PDX-GBMs. Quantifications were performed on at least three images taken from  
223 different areas per tumor for each marker (N=4).

224 To determine the expression of ASCL1, OLIG2, and SOX2 in human GBMs, RNA-seq of  
225 164 TCGA primary GBM and 5 normal brain samples were analyzed and categorized into the  
226 various subtypes using the 840 GBM Subtype Signature Genes (Verhaak et al., 2010). Average  
227 RPKM for *ASCL1*, *OLIG2*, and *SOX2* was determined for each GBM subtype. Outlier samples  
228 exhibiting an RPKM value > 2 standard deviations away from the mean were excluded.

229 To compare the Ki67 index between *Ascl1<sup>WT</sup>* (N=6) or *Ascl1<sup>CKO</sup>* (N=5) tumors, 20X  
230 immunofluorescence confocal images were taken from three different areas per tumor. Because  
231 the distribution of Ki67+ cells is not uniform within a large growing tumor, we limited our imaging  
232 to only regions with the highest density of Ki67+ cells. Quantification of the number of  
233 Ki67+;DAPI+/total DAPI+ cells was then performed blind of genotype for each image and  
234 compiled for comparison between *Ascl1<sup>WT</sup>* or *Ascl1<sup>CKO</sup>* tumors using a Wilcox test.

235

## 236 **RESULTS**

### 237 **Neurodevelopmental transcription factors ASCL1, OLIG2, and SOX2 are highly co-** 238 **expressed in human GBMs**

239 ASCL1, OLIG2, and SOX2 have previously been reported to be expressed in GBMs  
240 (Gangemi et al., 2009; Ligon et al., 2007; Lu et al., 2016; Park et al., 2017; Rheinbay et al., 2013;  
241 Singh et al., 2017; Somasundaram et al., 2005). However, the extent to which these factors are  
242 co-expressed in GBM tumors *in vivo* remains unclear. Using patient-derived-xenograft (PDX)-  
243 GBM lines (R548, R738), in which tumors from patients were passaged orthotopically in the brains  
244 of NOD-SCID mice (Figure 1A) (Marian et al., 2010; Marin-Valencia et al., 2012), we  
245 demonstrated that the transplanted tumors exhibit pathological characteristics of gliomas (Figure

246 1B,C) and express ASCL1, OLIG2, and SOX2 in the majority of tumor cells (Figure 1D-M).  
247 Quantification shows that each transcription factor occupied 74%, 81%, and 85% of tumor cells  
248 counterstained with DAPI, respectively (Figure 1N). Co-localization analysis revealed that 48% of  
249 ASCL1+ tumor cells were positive for the proliferation marker Ki67 (Figure 1K-M,O), whereas over  
250 90% of ASCL1+ cells were OLIG2+ and SOX2+ (Figure 1O), indicating that these three  
251 transcription factors are co-expressed in the majority of the PDX-GBM cells *in vivo*.

252 We next sought to determine the expression level of ASCL1, OLIG2, and SOX2 across  
253 primary GBMs exhibiting a variety of genomic alterations. Leveraging RNA-seq data of 164 TCGA  
254 primary GBMs, along with 5 normal control brain samples (Brennan et al., 2013), we first classified  
255 these primary GBMs into the four GBM subtypes (proneural, neural, classical, mesenchymal) as  
256 previously defined using an 840 gene list (Verhaak et al., 2010). Notably, while 107 samples can  
257 be classified into one of the four GBM subtypes, the remaining 57 samples expressed signatures  
258 of more than one subtype, which we referred collectively to as mixed GBMs (Figure S1). This  
259 finding echoes previous reports demonstrating the presence of multiple GBM subtype identities  
260 in different regions or cells of the same GBM tumors (Patel et al., 2014; Sottoriva et al., 2013).  
261 Expression of *ASCL1*, *OLIG2*, and *SOX2* across these GBM subtypes showed that they were  
262 highest in the proneural and classical subtypes, intermediate in the neural and mixed subtypes,  
263 but were extremely low in the mesenchymal subtype, even in comparison to normal brain (Figure  
264 1P-R). Collectively, these findings illustrate that *ASCL1*, *OLIG2*, and *SOX2* are co-expressed at  
265 relatively high levels in the majority of primary GBMs with the exception of the mesenchymal  
266 subtype.

267

268 **ASCL1 binds to genes encoding neurodevelopmental and glial transcription factors,**  
269 **oncogene signaling molecules, and factors involved in cell cycle control and chromatin**  
270 **organization**

271 Chromatin immunoprecipitation followed by deep sequencing (ChIP-seq) has previously  
272 been performed for ASCL1 in glioma cell lines in culture, and a dual role for ASCL1 was proposed  
273 to either promote or attenuate tumorigenicity depending on context (Park et al., 2017; Rheinbay  
274 et al., 2013). We performed ChIP-seq for ASCL1 in the two PDX-GBMs lines, both of which  
275 express high levels of ASCL1 (Figure 1), to identify its target genes *in vivo*. Using stringent peak  
276 calling criteria (Borromeo et al., 2014; Borromeo et al., 2016), we identified 9,816 statistically  
277 significant peaks in the genome of R548-PDX-GBM and 7,848 peaks in R738-PDX-GBM (blue  
278 rectangles, Figure 2A). Although only 4,207 of the significant peaks called overlapped in both  
279 PDX-GBMs, heatmaps of the ASCL1 ChIP-seq signal intensity, even for the non-significant peaks  
280 for each PDX-GBM, was noticeably higher than background for the combined 13,457 peaks  
281 called, indicating that the ASCL1 binding profile was similar in both PDX-GBMs (Figure 2A, Table  
282 S1).

283 To validate the quality and efficiency of our ChIP-seq, we next analyzed ASCL1 binding  
284 at known canonical targets (*DLL1*, *DLL3*, *NOTCH1*, *HES5*, *HES6* and *INSM1*) which have  
285 previously been shown to be directly regulated by ASCL1 in numerous contexts (Borromeo et al.,  
286 2014; Borromeo et al., 2016; Castro et al., 2011; Jacob et al., 2009; Park et al., 2017;  
287 Somasundaram et al., 2005; Ueno et al., 2012; Vias et al., 2008). As expected, ChIP-seq tracks  
288 revealed the presence of strong ASCL1 binding peaks at loci of all the canonical target genes  
289 examined (asterisk, Figure 2B). Moreover, ASCL1 is known to preferentially bind to degenerate  
290 CANNTG E-box motifs to regulate gene expression (Borromeo et al., 2014; Borromeo et al., 2016;  
291 Casey et al., 2018; Castro et al., 2011). Using *de novo* motif analysis (Heinz et al., 2010), we  
292 identified the bHLH CAGCTG E-box motif as being highly enriched directly beneath 74% of the  
293 13,457 ASCL1 combined peaks called, further confirming the quality of the ChIP-seq.  
294 Interestingly, we found that SOX and FOXO motifs were also significantly enriched within ASCL1  
295 binding peaks (Figure 2C), suggesting that ASCL1 may function in combination with these  
296 transcription factor families to regulate gene expression in GBMs.

297 To identify putative-targets of ASCL1 in GBMs, we then used GREAT (McLean et al.,  
298 2010) to associate nearby genes that were upstream or downstream of the 13,457 ASCL1 binding  
299 peaks. From this analysis, we uncovered a total of 8,791 genes (red oval, Figure 2D). We  
300 reasoned that if these genes are regulated by ASCL1 then they should also be expressed in a  
301 manner correlated with *ASCL1* expression in GBMs. By applying Spearman's rank-ordered  
302 correlation (>0.4) to RNA-seq of the 164 TCGA GBM samples, we then identified the top 10% of  
303 genes that showed a positive correlation with *ASCL1* expression across these tumor samples.  
304 We found 2,136 genes that are positively correlated with *ASCL1* expression (green oval, Figure  
305 2D). When we cross referenced these 2,136 genes with the 8,791 genes identified from the  
306 ASCL1 ChIP-seq, there was an overlap of 1,106 genes, which we define as ASCL1 target genes  
307 in GBM (yellow area, Figure 2D). Supporting the validity of this approach, all ASCL1 canonical  
308 targets examined were included in this 1,106 putative-target gene list (Figure 2D, Table S2).

309 By evaluating the ASCL1 putative-target gene list, we uncovered a variety of genes that  
310 are particularly relevant to GBM development. Indeed, some of the most notable target genes  
311 include other neurodevelopmental and/or glial transcription factors such as OLIG genes (*OLIG1*,  
312 *OLIG2*), SOX genes (*SOX1*, *SOX2*, *SOX3*, *SOX4*, *SOX6*, *SOX8*, *SOX10*), NFI genes (*NFIA*,  
313 *NFIB*, *NFIX*), POU domain genes (*POU3F2*, *POU3F3*, *POU6F1*), Sal-like genes (*SALL2*, *SALL3*),  
314 and homeobox genes (*NKX2.2*, *ZEB1*). The functions of OLIG2 (Ligon et al., 2007; Lu et al., 2016;  
315 Mehta et al., 2011), SOX2 (Gangemi et al., 2009; Singh et al., 2017), and NFIA (Glasgow et al.,  
316 2017; Lee, Hoxha, & Song, 2017) have previously been reported to be important for regulating  
317 the tumorigenic property of glioma cell lines and in glioma mouse models. ASCL1 target genes  
318 also include numerous cell cycle (*CCND2*, *CCNE2*, *CDC25C*, *CDK4*, *CDK5R1*, *CSNK1E*, *E2F2*,  
319 *MCPH1*, *POLA2*, *PRIM2*), mitosis (*AURKB*, *BRSK1*, *MCM10*, *RCC2*), chromatin modification  
320 (*CHD3*, *CHD6*, *CHD7*, *KDM3B*, *KDM4B*, *SMARCA*, *SMARCB1*, *SMARCD1*), as well as  
321 oncogenic signal transduction related genes (*AKT3*, *EGFR*, *ERBB3*, *GSK3 $\beta$* , *MYCN*, *PIK3R1*,

322 *RTKN, TCF7L1, TCF7L2*) (Table S2). Strong ASCL1 binding peaks at the loci of some of these  
323 genes in the PDX-GBMs lines are illustrated (asterisks, Figure 2E-H).

324 We next wanted to know how the expression of the 1,106 ASCL1 putative-target genes  
325 sort across the various GBM subtypes using RNA-seq of the 164 primary GBMs. Heatmap and  
326 dendrogram analysis revealed that, similar to *ASCL1*, the 1,106 putative-target genes were highly  
327 expressed in the proneural and classical GBM subtypes, in the majority of neural and mixed GBM  
328 subtypes, but was mostly absent in the mesenchymal GBM subtype (Figure 2I). In all, 109 of the  
329 TCGA GBM samples were positive for the ASCL1 putative-target genes, while the remaining 55  
330 samples express very little or low levels of the ASCL1 putative-targets.

331 To gain insights into the collective significance of the 1,106 ASCL1 putative targets, we  
332 then performed gene set over-representation analysis to annotate their function using  
333 ConsensusPathDB, a comprehensive collection of molecular interaction databases integrated  
334 from multiple public repositories (Herwig et al., 2016). Interestingly, the top most enriched  
335 pathway identified was cell cycle (Figure 2J). This is consistent with a previous report showing  
336 that positive and negative cell cycle regulators in neural progenitor cells are targets of ASCL1  
337 (Castro et al., 2011). Other pathways that are also enriched for ASCL1 targets include those  
338 involved in chromatin segregation such as Aurora B Signaling and Amplification of Signal from  
339 Kinetochores, and intracellular signaling pathways such as those involved in PIP3 Activates AKT  
340 Signaling, Signaling by Rho GTPases, Hippo Signaling Pathway, and Wnt Signaling Pathway &  
341 Pluripotency. Finally, cancer pathways such as Retinoblastoma in Cancer, Hepatocellular  
342 Carcinoma, and Endometrial Cancer were also enriched for ASCL1 targets (Figure 2J, Table S3).  
343 Taken together, these findings suggest that ASCL1 is a transcriptional regulator at the epicenter  
344 of multiple biological processes that are fundamental to cancer development.

345  
346 **ASCL1, OLIG2, and SOX2 are co-expressed in early and terminal stage tumors of a mouse**  
347 **glioma model**

348 To functionally test ASCL1's role in gliomagenesis *in vivo*, we began by characterizing the  
349 temporal expression pattern of ASCL1 along with OLIG2, SOX2, and glial lineage markers in brain  
350 tumors induced in a mouse model carrying floxed alleles of the tumor suppressor genes  
351 Neurofibromin 1 (*Nf1*) and tumor protein 53 (*Tp53*) (*Nf1<sup>F/F</sup>;Tp53<sup>F/F</sup>*) (Lin et al., 2004; Zhu et al.,  
352 2001). *NF1* and *TP53* are two of the most highly mutated genes in human GBM (2008; Brennan  
353 et al., 2013; Verhaak et al., 2010), and Cre-recombinase deletion of these two tumor suppressor  
354 genes (*Nf1;Tp53<sup>CKO</sup>*) in neural progenitors or glial precursor cells have previously been shown to  
355 be fully penetrant in producing glioma tumors in the brain of mice (Alcantara Llaguno et al., 2009;  
356 Alcantara Llaguno et al., 2015; Zhu et al., 2005). When mice carrying a *Glast<sup>CreERT2/+</sup>* knock-in  
357 allele (Mori et al., 2006) was crossed with the *Rosa26-loxP-stop-loxP-tdTomato* (*R26R<sup>LSL-tdTom</sup>*)  
358 reporter line (Madisen et al., 2010), we found that tdTomato fluorescence was restricted in the  
359 brain of neonatal pups if tamoxifen was administered at E14.5 (Figure 3A-C), making *Glast<sup>CreERT2/+</sup>*  
360 ideal to combine with the *Nf1<sup>F/F</sup>;Tp53<sup>F/F</sup>* alleles to induce brain tumors.

361 To visualize the tumors as they develop in the brain, a *R26R<sup>LSL-YFP</sup>* reporter allele (Srinivas  
362 et al., 2001) was incorporated into the glioma mouse model (*Glast<sup>CreERT/+</sup>;Nf1<sup>F/F</sup>;Tp53<sup>F/F</sup>;R26R<sup>LSL-</sup>*  
363 *YFP*). Tamoxifen was then administered to pregnant dams at E14.5 to induce *Nf1;Tp53<sup>CKO</sup>* in neural  
364 progenitors of embryos. We first analyzed early tumors in the offspring at postnatal day (P) 45, at  
365 which point the majority of the mice were still asymptomatic and have yet to exhibit neurological  
366 symptoms. As expected, we were able to observe the presence of a tumor in some mice marked  
367 by intense YFP expression typically on one side of the brain surrounding the ventricle (Figure 3D-  
368 H). The tumor at this stage was not easily distinguishable from non-tumor tissues without YFP  
369 immunohistochemistry, yet both PDGFR $\alpha$ , an oligodendrocyte precursor cell (OPC) marker, and  
370 GFAP, an astrocyte marker, were ectopically expressed on the tumor side, indicating that the  
371 tumor is a glioma (Figure 3I-L). High magnifications revealed that ASCL1, OLIG2, and SOX2 are  
372 also expressed specifically within the YFP+ tumor cells (Figure 3M-R), and are highly irregular in  
373 shape, morphology, and density compared to normal YFP+ cells on the non-tumor side (not

374 shown). Interestingly, the YFP+ tumor cells co-localized extensively with PDGFR $\alpha$  (Figure 3S,T)  
375 but not with GFAP or the neuronal marker NEUN (Figure 3U-W). The lack of co-localization  
376 between YFP and GFAP was similar to that observed in tumors of another glioma mouse model  
377 in which PDGF stimulation was combined with deletion of another tumor suppressor, *Pten* (Lei et  
378 al., 2011). This implies that the ectopic GFAP found infiltrating the YFP+ tumor tissue in our model  
379 may be reactive astrocytes rather than tumor cells themselves.

380 From P60-120, we found that 100% of *Nf1;Tp53<sup>CKO</sup>* mice exhibited neurological symptoms  
381 and tumors that had evolved into an expanded mass with high mitotic index and microvascular  
382 proliferation resembling that of high grade gliomas (Figure 4A,B). We termed these *Ascl1<sup>WT</sup>* tumor  
383 mice (N=29, blue line), which exhibited a median survival of 102 days, while CreER-negative  
384 littermate controls (N=19, green line) were tumor-free and healthy (Figure 4P). Over 90% of the  
385 tumors were found in the cortex and/or striatum area, while a minority were also found in olfactory  
386 bulb, diencephalon, midbrain, or cerebellum (Figure 4O). Similar to the early tumors and the PDX-  
387 GBMs, ASCL1, OLIG2, and SOX2 were co-expressed in the tumor cells of these terminal tumors,  
388 and many ASCL1+ tumor cells were also Ki67+ (Figure 4C-J). PDGFR $\alpha$  was also highly co-  
389 expressed by the ASCL1+ (Figure 4K) and OLIG2+ (not shown) tumor cells, whereas GFAP and  
390 to a lesser extent S100 $\beta$  and NEUN, although found in some parts of the tumor, did not overlap  
391 significantly with SOX2 or ASCL1 (Figure 4L-N).

392 Overall, our findings illustrate that ASCL1, OLIG2, and SOX2 are co-expressed in tumor  
393 cells of both early and terminal tumors of the glioma mouse model *in vivo*, and tumor cells maintain  
394 a molecular identity reminiscent of that of OPCs.

395

396 **Loss of ASCL1 decreases the proliferation of gliomas and increases the survival of tumor**  
397 **bearing mice**



398           Currently, the direct requirement of ASCL1 in brain tumor formation and progression from  
399 low-grade gliomas to high-grade GBMs *in vivo* remains unknown. To address this, we  
400 incorporated *Ascl1*<sup>GFP</sup> knock-in (null) and *Ascl1*<sup>Floxed</sup> alleles into the glioma mouse model to  
401 generate *Glast*<sup>CreERT2</sup>;*Ascl1*<sup>GFP/F</sup>;*Nf1*<sup>F/F</sup>;*Tp53*<sup>F/F</sup> and *Glast*<sup>CreERT2</sup>;*Ascl1*<sup>F/F</sup>;*Nf1*<sup>F/F</sup>;*Tp53*<sup>F/F</sup> mice,  
402 respectively, both of which when administered with tamoxifen at E14.5 will result in triple  
403 conditional knock-out of *Ascl1* along with *Nf1* and *Tp53* (*Ascl1*;*Nf1*;*Tp53*<sup>CKO</sup>). To control for the  
404 possible effects of genetic background on glioma phenotype observed, we also generated  
405 *Glast*<sup>CreERT2</sup>;*Ascl1*<sup>GFP/+</sup>;*Nf1*<sup>F/F</sup>;*Tp53*<sup>F/F</sup> and *Glast*<sup>CreERT2</sup>;*Ascl1*<sup>F/+</sup>;*Nf1*<sup>F/F</sup>;*Tp53*<sup>F/F</sup> mice in parallel for  
406 comparison, both of which developed tumors that are still heterozygous for *Ascl1* when induced  
407 with tamoxifen, and are referred to as *Ascl1*<sup>HET</sup> tumor mice.

408           Previous reports demonstrate that ASCL1 is essential for the proliferation of GBM cell  
409 lines *in vitro* (Park et al., 2017; Rheinbay et al., 2013). In contrast, *in vivo* we found that  
410 *Ascl1*;*Nf1*;*Tp53*<sup>CKO</sup> mice (hence forth referred to as *Ascl1*<sup>CKO</sup> tumor mice, N=39) still developed  
411 high-grade tumors that were phenotypically consistent with high grade gliomas (Figure 5A).  
412 Furthermore, *Ascl1*<sup>CKO</sup> tumor penetrance and location (Figure 5L,M) in the brain was similar to  
413 the *Ascl1*<sup>HET</sup> (not shown) and *Ascl1*<sup>WT</sup> tumors (Figure 4O,P). We confirmed that ASCL1 was  
414 indeed absent in *Ascl1*<sup>CKO</sup> tumors. As illustrated for a *Glast*<sup>CreERT2</sup>;*Ascl1*<sup>GFP/F</sup>;*Nf1*<sup>F/F</sup>;*Tp53*<sup>F/F</sup> mouse,  
415 GFP driven by the endogenous *Ascl1* locus marks precisely the tumor cells but ASCL1 was no  
416 longer detected (Figure 5B,C). Notably, OLIG2 and SOX2 (Figure 5D,E,J,K), which we identified  
417 as ASCL1 target genes, were still expressed, indicating that expression of these two transcription  
418 factors do not depend solely on ASCL1. Similarly, OPC markers such as PDGFR $\alpha$ , the  
419 chondroitin sulfate NG2, and SOX10 were still expressed in the *Ascl1*<sup>CKO</sup> tumors (Figure 5D,F,G).  
420 As observed in *Ascl1*<sup>WT</sup> tumors, GFAP did not co-localize extensively with GFP+ tumor cells,  
421 despite being expressed in some regions of the tumor (Figure 5H,I). Together, these findings  
422 demonstrate that glial transcription factors and the OPC-like identity of the tumor cells are still  
423 retained in the absence of ASCL1.

424 Notably, the *Ascl1*<sup>CKO</sup> tumor mice survived longer compared to *Ascl1*<sup>HET</sup> and *Ascl1*<sup>WT</sup> tumor  
425 mice. Specifically, while the *Ascl1*<sup>HET</sup> tumor mice (N=34) died between P60-130, with a median  
426 survival of 104 days, which is very similar to *Ascl1*<sup>WT</sup> tumor mice (median survival of 102 days),  
427 *Ascl1*<sup>CKO</sup> tumor mice (N=39) died later between P90-180, with a median survival of around 122  
428 days (compare red versus light and dark blue lines, Figure 5M). This improvement in survival for  
429 the *Ascl1*<sup>CKO</sup> tumor mice also holds true even when analyzed by gender (not shown) and strongly  
430 suggests that it was due to the loss of ASCL1.

431 To determine what may account for the improved survival of the *Ascl1*<sup>CKO</sup> tumor mice, we  
432 assessed tumor proliferation by quantifying the percentage of tumor cells that were Ki67+ in  
433 comparison to *Ascl1*<sup>WT</sup> tumor mice. Because the density of Ki67+ cells can vary dramatically  
434 across a large tumor depending on necrosis or the integrity/quality of the tumor tissue, we chose  
435 to image and quantify several regions of each *Ascl1*<sup>CKO</sup> (N=5) or *Ascl1*<sup>WT</sup> tumor (N=6) with the  
436 highest density of Ki67+ cells (Figure 5N,O). Overall, *Ascl1*<sup>CKO</sup> tumors exhibited a decrease of  
437 about 30% Ki67+ cells compared to *Ascl1*<sup>WT</sup> tumors (Figure 5P), which is consistent with our  
438 previous finding that numerous cell cycle and mitotic genes are targets of ASCL1. This decrease  
439 in Ki67+ cells was similar to that observed for adult OPCs in the spinal cord when *Ascl1* was  
440 conditionally deleted (Kelenis, Hart, Edwards-Fligner, Johnson, & Vue, 2018) and supports the  
441 interpretation that the increased survival of *Ascl1*<sup>CKO</sup> tumor mice may result from a decrease in  
442 the rate of tumor cell proliferation.

443

#### 444 **Transcriptome of mouse GBM tumors showed that loss of ASCL1 is associated with down-** 445 **regulation of cell cycle genes**

446 To determine if the loss of ASCL1 altered the molecular profiles of the mouse glioma  
447 tumors, we carefully isolated tumor tissues from *Ascl1*<sup>WT</sup> (N=5) and *Ascl1*<sup>CKO</sup> (N=5) tumor mice  
448 for bulk RNA-seq analysis. RNA-seq tracks of the *Ascl1* locus show that *Exon 1* and *2* of the *Ascl1*  
449 *mRNA* (containing the entire coding sequence), were completely absent in all *Ascl1*<sup>CKO</sup> tumors

450 but were present in *Ascl1*<sup>WT</sup> tumors (Figure 6A), confirming efficient deletion of the *Ascl1*<sup>Floxed</sup>  
451 allele. We first compared the transcriptomes of the *Ascl1*<sup>WT</sup> and *Ascl1*<sup>CKO</sup> tumors with  
452 transcriptomes of CNS cell types, including OPCs, newly formed oligodendrocytes (NFO), mature  
453 oligodendrocytes (MO), astrocytes (AS), neurons, and whole cortex (WC) (Zhang et al., 2014). A  
454 multidimensional scaling (MDS) plot shows that both the *Ascl1*<sup>WT</sup> and *Ascl1*<sup>CKO</sup> tumors cluster  
455 together and away from the CNS cell types, and therefore are more similar to each other than to  
456 neurons or any of the glial lineage cells (Figure 6B). When we further analyzed RNA-seq of  
457 *Ascl1*<sup>WT</sup> and *Ascl1*<sup>CKO</sup> tumors using the top 50 signature genes for each CNS cell type, both tumor  
458 types more closely resemble that of OPCs versus the other CNS cell types (Figure 6C). This  
459 finding further supports the notion that OPCs, which are highly proliferative, may be the precursor  
460 cell-of-origin for the glioma tumors in this model.

461 Finally, we sought to identify genes that are differentially expressed between *Ascl1*<sup>WT</sup> and  
462 *Ascl1*<sup>CKO</sup> tumors. Analysis of ASCL1 canonical target genes revealed that *Dll3*, similar to *Ascl1*,  
463 was significantly decreased, while *Hes5* and *Hes6* were lowered (Figure 6D), but *Dll1*, *Notch1*,  
464 and *Insm1* (not shown) were unchanged in *Ascl1*<sup>CKO</sup> tumors. Interestingly, glial transcription  
465 factors *Nfia* and *Nfib*, and several mitotic (*Aurkb*) and chromatin modifying (*Hdac5*) genes were  
466 significantly decreased, whereas *Olig1*, *Olig2*, and cell cycle genes (*Ccnd2*, and *Cdk4*) were  
467 modestly reduced in *Ascl1*<sup>CKO</sup> tumors (Figure 6E,G). In contrast, *Sox* genes were bidirectionally  
468 affected by the loss of ASCL1. For instance, although *Sox3* and *Sox11* were decreased, *Sox2*  
469 and *Sox4* appeared upregulated in the *Ascl1*<sup>CKO</sup> tumors (Figure 6F). Heatmap and dendrogram  
470 analysis of all 1,054 ASCL1 putative targets (converted from a list of 1,106 genes from human  
471 GBMs, Table S3), revealed that there were as many genes being upregulated as there were  
472 genes being downregulated by the loss of ASCL1 (Figure 6H, Table S4). We also identified over  
473 50 indirect targets of ASCL1 that were either upregulated or downregulated in the *Ascl1*<sup>CKO</sup> tumors  
474 (Figure 6I, Table S5). Finally, in agreement with our earlier finding that tumor cell proliferation is  
475 decreased in the absence of ASCL1, gene-set-enrichment analysis revealed that cell cycle related

476 genes were highly enriched in the down-regulated genes in the *Ascl1*<sup>CKO</sup> tumors (Figure 6J). This  
477 suggests that a decreased in cell-cycle related gene expression may contribute to the increase in  
478 survival of the *Ascl1*<sup>CKO</sup> tumor mice.

479 In summary, our findings highlight an *in vivo* role for ASCL1 in modulating the expression  
480 of a variety of genes, including neurodevelopmental or glial transcription factors and cell cycle  
481 genes, either directly or indirectly, that are crucial for the proliferation of GBM tumors in the brain.

482

## 483 DISCUSSION

484 We demonstrate in this study that ASCL1 is highly expressed in the majority of PDX-GBM  
485 cells *in vivo*, with over 90% of ASCL1+ cells co-expressing OLIG2 and SOX2. Interestingly, in  
486 addition to OLIG2 and SOX2, we find that expression of a variety of other genes encoding  
487 transcription factors such as NFI, POU domain, Sal-like, SOX, as well as homeobox are also  
488 highly correlated with *ASCL1* expression in RNA-seq of primary GBMs (Table S2). This finding is  
489 similar to that previously reported in GSCs from cultured GBM cell lines (Rheinbay et al., 2013;  
490 Suva et al., 2014). Accordingly, we find that these transcription factor encoding genes are not  
491 only correlated with *ASCL1* expression but are also targets of ASCL1 binding (Table S1). These  
492 findings support a complex transcription factor interaction network in which the co-expression of  
493 these transcription factors may be interdependent on each other, and this co-expression is  
494 essential for regulating genes crucial for maintaining GSCs in an aberrant stem-like state of  
495 dedifferentiation and proliferation. In agreement with this, it is not surprising that combinatorial  
496 over-expression of multiple transcription factors is necessary and sufficient to reprogram  
497 differentiated glioma cells or immortalized astrocytes into tumor propagating cells (Singh et al.,  
498 2017; Suva et al., 2014).

499 ChIP-seq for ASCL1 has previously been performed for GBM cell lines in culture revealing  
500 that ASCL1 directly interacts with Wnt signaling by binding to genes such as *AXIN2*, *DKK1*, *FZD5*,  
501 *LGR5*, *LRP5*, *TCF7* and *TCF7L1*. A model was proposed in which ASCL1 functions at least in

502 part by repressing an inhibitor of Wnt signaling, *DKK1*, resulting in increased signaling through  
503 this pathway to maintain the tumorigenicity of GBM cells (Rheinbay et al., 2013). Similarly, in this  
504 study we find that all of the aforementioned genes as well as numerous other Wnt related genes  
505 (*GSK3B*, *LRP4*, *LRP6*, *TCF7L2*) are directly bound by ASCL1 (Table S1). Additionally, expression  
506 of many of these Wnt related genes is positively correlated with *ASCL1* expression when analyzed  
507 across RNA-seq of the 164 TCGA primary GBM samples, and Wnt Signaling and Pluripotency  
508 was identified as one of the pathways significantly over-represented by the ASCL1 target genes  
509 that we identified in this study (Figure 2J, Table S2). Despite these findings, RNA-seq from mouse  
510 *Ascl1<sup>CKO</sup>* tumors revealed that expression of many of the Wnt related genes was unaffected by  
511 the loss of ASCL1. Thus, although ASCL1 binds to and may contribute to the regulation of some  
512 of these genes, particularly in an *in vitro* setting (Rheinbay et al., 2013), expression of Wnt  
513 pathway genes remains in GBMs *in vivo* in the absence of ASCL1. Consequently, the presence  
514 of Wnt signaling may partly contribute to the formation of *Ascl1<sup>CKO</sup>* tumors in the brain of the  
515 glioma mouse model.

516 In addition to gliomas, ASCL1 is highly expressed in cancers with neuroendocrine  
517 characteristics from multiple tissues including small cell lung carcinoma (SCLC), prostate cancer,  
518 and thyroid medullary carcinoma (Chen, Kunnimalaiyaan, & Van Gompel, 2005; Rapa et al., 2013;  
519 Zhang et al., 2018). Previously, we reported that ASCL1 is required for tumor formation in a mouse  
520 model of SCLC (Borromeo et al., 2016). This finding reflects the requirement for ASCL1 in the  
521 generation and survival of pulmonary neuroendocrine cells (PNECs), a presumptive cell-of-origin  
522 for SCLC. In contrast, in this study we found that ASCL1 is not required for GBM formation in the  
523 brain of the glioma mouse model, although disease progression is altered and the animals have  
524 extended survival. Based on cell lineage markers in the glioma mouse model used here, OPCs  
525 are implicated as the presumptive cell-of-origin for the tumors. OPCs are known for displaying  
526 highly migratory and proliferative behavior similar to GBM. OPC specification and generation in  
527 the CNS is dependent upon OLIG2 (Lu et al., 2002; Zhou, Choi, & Anderson, 2001), however

528 ASCL1 also plays an important role to regulate the number and proliferation of OPCs (Kelenis et  
529 al., 2018; Nakatani et al., 2013; Parras et al., 2007; Vue et al., 2014). Interestingly, in addition to  
530 ASCL1 and OLIG2, transcription factors such as NFIA, SOX2, and SOX10 are also expressed in  
531 OPCs. However, as OPCs differentiate to become mature oligodendrocytes, only OLIG2 and  
532 SOX10 are maintained while ASCL1, NFIA, and SOX2 are down-regulated (Glasgow et al., 2014;  
533 Laug, Glasgow, & Deneen, 2018; Nakatani et al., 2013). This down-regulation suggests that the  
534 co-expression of these transcription factors is important for maintaining OPCs in a progenitor-like  
535 state, and the loss of just one of these factors does not completely abrogate tumor formation  
536 following deletion of *Nf1* and *Tp53* because OPCs are still generated, and are thus susceptible to  
537 being transformed into glioma. The direct roles of NFIA and OLIG2 in tumor development in  
538 glioma mouse models were also previously tested. Similar to the findings for ASCL1, tumor  
539 formation persisted in the absence of each of these transcription factors. Furthermore, despite  
540 utilizing different approaches and driver mutations to induce tumor formation, the loss of NFIA or  
541 OLIG2 was also accompanied by significant decreases in tumor cell proliferation resulting in an  
542 increase in survival for their respective mouse models (Glasgow et al., 2017; Lu et al., 2016).  
543 Together, these studies illustrate potential redundant roles for neurodevelopmental or glial  
544 transcription factors in driving GBM formation and progression *in vivo* in the brain, where the loss  
545 of one factor is likely to be compensated by the remaining transcription factors.

546         Similar to our study here, deletion of *Nf1*, *Tp53*, along with or without *Pten*, was previously  
547 shown to be fully penetrant in producing GBM tumors in the brain of mice (Alcantara Llaguno et  
548 al., 2009; Alcantara Llaguno et al., 2015; Zhu et al., 2005). More specifically, tumors were  
549 successfully induced from neural stem cells in the SVZ of the lateral ventricles, including ASCL1+  
550 transiently amplifying progenitors, as well as OPCs. It was reported that two types of glioma  
551 tumors were observed when *Nf1* and *Tp53* were deleted in the adult brain (Alcantara Llaguno et  
552 al., 2015). Type 1 tumors, which are found in dorsal/anterior brain regions such as striatum,  
553 hippocampus, and cortex, are highly infiltrative and aggressive. Type 2 tumors, on the other hand,

554 are found more in ventral/posterior brain regions such as the diencephalon and brainstem, and  
555 exhibit well-defined boundaries. Based on gene expression, Type 1 tumors express high levels  
556 of GFAP and are speculated to be derived from neural stem cells in the SVZ, whereas Type 2  
557 tumors express high levels of OLIG2 and PDGFR $\alpha$ , and likely to be derived from OPCs. Over  
558 90% of the mouse GBM tumors that we observed in this study are found in the telencephalon,  
559 predominantly in the cortex and striatum, suggesting that they may be similar to Type 1 tumors.  
560 However, although GFAP expression is high in some of the tumors of our model, the majority of  
561 GFAP expressing cells do not seem to co-localize with Cre-reporters such as YFP, which directly  
562 mark the tumor cells. Instead, YFP colocalizes extensively with OLIG2 and PDGFR $\alpha$ , indicating  
563 that they are more similar to Type 2 tumors in terms of gene expression. This inconsistency likely  
564 reflects our use of *Glast*<sup>CreERT2</sup> to delete *Nf1* and *Tp53*, which may target neural progenitors in the  
565 SVZ as well as glial precursor cells outside of the SVZ, and the timing of tumor induction  
566 embryonically in our model rather than in the adult brain.

567 In conclusion, the tumors induced in our mouse model are highly heterogenous based on  
568 RNA-seq analysis, which is similar to that seen for human GBMs (Patel et al., 2014; Sottoriva et  
569 al., 2013). This heterogeneity is likely the result of different tumors being spontaneously derived  
570 from different cell-of-origins in the various brain regions, and are thus exposed to different  
571 microenvironments. Despite this heterogeneity, however, the loss of ASCL1 still significantly  
572 delays tumor progression and resulted in a significant increase in survival for *Ascl1*<sup>CKO</sup> tumor mice,  
573 illustrating an important role for ASCL1 in controlling the rate of GBM proliferation *in vivo*. A  
574 fundamental question remaining for future studies is whether ASCL1 and other transcription  
575 factors are similarly required directly within growing GBMs in the brain, and how much these  
576 transcription factors may contribute to GBM recurrence, if any, following multimodal treatments.

577 **REFERENCES**

- 578 Alcantara Llaguno, S., Chen, J., Kwon, C. H., Jackson, E. L., Li, Y., Burns, D. K., . . . Parada, L.  
579 F. (2009). Malignant astrocytomas originate from neural stem/progenitor cells in a somatic  
580 tumor suppressor mouse model. *Cancer Cell*, *15*(1), 45-56. doi:10.1016/j.ccr.2008.12.006  
581 Alcantara Llaguno, S. R., Wang, Z., Sun, D., Chen, J., Xu, J., Kim, E., . . . Parada, L. F. (2015).  
582 Adult Lineage-Restricted CNS Progenitors Specify Distinct Glioblastoma Subtypes.  
583 *Cancer Cell*, *28*(4), 429-440. doi:10.1016/j.ccell.2015.09.007  
584 Andersen, J., Urban, N., Achimastou, A., Ito, A., Simic, M., Ullom, K., . . . Guillemot, F. (2014). A  
585 transcriptional mechanism integrating inputs from extracellular signals to activate  
586 hippocampal stem cells. *Neuron*, *83*(5), 1085-1097. doi:10.1016/j.neuron.2014.08.004  
587 Babu, R., Komisarow, J. M., Agarwal, V. J., Rahimpour, S., Iyer, A., Britt, D., . . . Adamson, C.  
588 (2016). Glioblastoma in the elderly: the effect of aggressive and modern therapies on  
589 survival. *J Neurosurg*, *124*(4), 998-1007. doi:10.3171/2015.4.JNS142200  
590 Bao, S., Wu, Q., McLendon, R. E., Hao, Y., Shi, Q., Hjelmeland, A. B., . . . Rich, J. N. (2006).  
591 Glioma stem cells promote radioresistance by preferential activation of the DNA damage  
592 response. *Nature*, *444*(7120), 756-760. doi:10.1038/nature05236  
593 Borromeo, M. D., Meredith, D. M., Castro, D. S., Chang, J. C., Tung, K. C., Guillemot, F., &  
594 Johnson, J. E. (2014). A transcription factor network specifying inhibitory versus excitatory  
595 neurons in the dorsal spinal cord. *Development*. doi:10.1242/dev.105866  
596 Borromeo, M. D., Savage, T. K., Kollipara, R. K., He, M., Augustyn, A., Osborne, J.  
597 K., . . . Johnson, J. E. (2016). ASCL1 and NEUROD1 Reveal Heterogeneity in Pulmonary  
598 Neuroendocrine Tumors and Regulate Distinct Genetic Programs. *Cell Rep*, *16*(5), 1259-  
599 1272. doi:10.1016/j.celrep.2016.06.081  
600 Brennan, C., Momota, H., Hambardzumyan, D., Ozawa, T., Tandon, A., Pedraza, A., & Holland,  
601 E. (2009). Glioblastoma subclasses can be defined by activity among signal transduction  
602 pathways and associated genomic alterations. *PLoS One*, *4*(11), e7752.  
603 doi:10.1371/journal.pone.0007752  
604 Brennan, C. W., Verhaak, R. G., McKenna, A., Campos, B., Nounshmehr, H., Salama, S.  
605 R., . . . TCGA, R. N. (2013). The somatic genomic landscape of glioblastoma. *Cell*, *155*(2),  
606 462-477. doi:10.1016/j.cell.2013.09.034  
607 Casey, B. H., Kollipara, R. K., Pozo, K., & Johnson, J. E. (2018). Intrinsic DNA binding  
608 properties demonstrated for lineage-specifying basic helix-loop-helix transcription factors.  
609 *Genome Res*, *28*(4), 484-496. doi:10.1101/gr.224360.117  
610 Castro, D. S., Martynoga, B., Parras, C., Ramesh, V., Pacary, E., Johnston, C., . . . Guillemot,  
611 F. (2011). A novel function of the proneural factor Ascl1 in progenitor proliferation  
612 identified by genome-wide characterization of its targets. *Genes Dev*, *25*(9), 930-945.  
613 doi:10.1101/gad.627811  
614 Chen, H., Kunnimalaiyaan, M., & Van Gompel, J. J. (2005). Medullary thyroid cancer: the  
615 functions of raf-1 and human achaete-scute homologue-1. *Thyroid*, *15*(6), 511-521.  
616 doi:10.1089/thy.2005.15.511  
617 Chen, J., Li, Y., Yu, T. S., McKay, R. M., Burns, D. K., Kernie, S. G., & Parada, L. F. (2012). A  
618 restricted cell population propagates glioblastoma growth after chemotherapy. *Nature*,  
619 *488*(7412), 522-526. doi:10.1038/nature11287  
620 (2008). Comprehensive genomic characterization defines human glioblastoma genes and core  
621 pathways. *Nature*, *455*(7216), 1061-1068. doi:10.1038/nature07385  
622 Gangemi, R. M., Griffero, F., Marubbi, D., Perera, M., Capra, M. C., Malatesta, P., . . . Corte, G.  
623 (2009). SOX2 silencing in glioblastoma tumor-initiating cells causes stop of proliferation  
624 and loss of tumorigenicity. *Stem Cells*, *27*(1), 40-48. doi:10.1634/stemcells.2008-0493



- 625 Glasgow, S. M., Carlson, J. C., Zhu, W., Chaboub, L. S., Kang, P., Lee, H. K., . . . Deneen, B.  
626 (2017). Glia-specific enhancers and chromatin structure regulate NFIA expression and  
627 glioma tumorigenesis. *Nat Neurosci*, *20*(11), 1520-1528. doi:10.1038/nn.4638
- 628 Glasgow, S. M., Zhu, W., Stolt, C. C., Huang, T. W., Chen, F., LoTurco, J. J., . . . Deneen, B.  
629 (2014). Mutual antagonism between Sox10 and NFIA regulates diversification of glial  
630 lineages and glioma subtypes. *Nat Neurosci*, *17*(10), 1322-1329. doi:10.1038/nn.3790
- 631 Heinz, S., Benner, C., Spann, N., Bertolino, E., Lin, Y. C., Laslo, P., . . . Glass, C. K. (2010).  
632 Simple combinations of lineage-determining transcription factors prime cis-regulatory  
633 elements required for macrophage and B cell identities. *Mol Cell*, *38*(4), 576-589.  
634 doi:10.1016/j.molcel.2010.05.004
- 635 Helms, A. W., Battiste, J., Henke, R. M., Nakada, Y., Simplicio, N., Guillemot, F., & Johnson, J.  
636 E. (2005). Sequential roles for Mash1 and Ngn2 in the generation of dorsal spinal cord  
637 interneurons. *Development*, *132*(12), 2709-2719. doi:10.1242/dev.01859
- 638 Herwig, R., Hardt, C., Lienhard, M., & Kamburov, A. (2016). Analyzing and interpreting genome  
639 data at the network level with ConsensusPathDB. *Nat Protoc*, *11*(10), 1889-1907.  
640 doi:10.1038/nprot.2016.117
- 641 Jacob, J., Storm, R., Castro, D. S., Milton, C., Pla, P., Guillemot, F., . . . Briscoe, J. (2009).  
642 Insm1 (IA-1) is an essential component of the regulatory network that specifies  
643 monoaminergic neuronal phenotypes in the vertebrate hindbrain. *Development*, *136*(14),  
644 2477-2485. doi:10.1242/dev.034546
- 645 Kageyama, R., Ohtsuka, T., Hatakeyama, J., & Ohsawa, R. (2005). Roles of bHLH genes in  
646 neural stem cell differentiation. *Exp Cell Res*, *306*(2), 343-348.  
647 doi:10.1016/j.yexcr.2005.03.015
- 648 Kelenis, D. P., Hart, E., Edwards-Fligner, M., Johnson, J. E., & Vue, T. Y. (2018). ASCL1  
649 regulates proliferation of NG2-glia in the embryonic and adult spinal cord. *Glia*.  
650 doi:10.1002/glia.23344
- 651 Kim, D., Pertea, G., Trapnell, C., Pimentel, H., Kelley, R., & Salzberg, S. L. (2013). TopHat2:  
652 accurate alignment of transcriptomes in the presence of insertions, deletions and gene  
653 fusions. *Genome Biol*, *14*(4), R36. doi:10.1186/gb-2013-14-4-r36
- 654 Kim, E. J., Ables, J. L., Dickel, L. K., Eisch, A. J., & Johnson, J. E. (2011). Ascl1 (Mash1)  
655 defines cells with long-term neurogenic potential in subgranular and subventricular zones  
656 in adult mouse brain. *PLoS One*, *6*(3), e18472. doi:10.1371/journal.pone.0018472
- 657 Kim, E. J., Leung, C. T., Reed, R. R., & Johnson, J. E. (2007). In vivo analysis of Ascl1 defined  
658 progenitors reveals distinct developmental dynamics during adult neurogenesis and  
659 gliogenesis. *J Neurosci*, *27*(47), 12764-12774. doi:10.1523/JNEUROSCI.3178-07.2007
- 660 Lan, X., Jörg, D. J., Cavalli, F. M. G., Richards, L. M., Nguyen, L. V., Vanner, R. J., . . . Dirks, P.  
661 B. (2017). Fate mapping of human glioblastoma reveals an invariant stem cell hierarchy.  
662 *Nature*, *549*(7671), 227-232. doi:10.1038/nature23666
- 663 Langmead, B., & Salzberg, S. L. (2012). Fast gapped-read alignment with Bowtie 2. *Nat*  
664 *Methods*, *9*(4), 357-359. doi:10.1038/nmeth.1923
- 665 Lathia, J. D., Gallagher, J., Myers, J. T., Li, M., Vasanji, A., McLendon, R. E., . . . Rich, J. N.  
666 (2011a). Direct in vivo evidence for tumor propagation by glioblastoma cancer stem cells.  
667 *PLoS One*, *6*(9), e24807. doi:10.1371/journal.pone.0024807
- 668 Lathia, J. D., Heddleston, J. M., Venere, M., & Rich, J. N. (2011b). Deadly teamwork: neural  
669 cancer stem cells and the tumor microenvironment. *Cell Stem Cell*, *8*(5), 482-485.  
670 doi:10.1016/j.stem.2011.04.013
- 671 Laug, D., Glasgow, S. M., & Deneen, B. (2018). A glial blueprint for gliomagenesis. *Nat Rev*  
672 *Neurosci*, *19*(7), 393-403. doi:10.1038/s41583-018-0014-3
- 673 Lee, J., Hoxha, E., & Song, H. R. (2017). A novel NFIA-NFκB feed-forward loop contributes to  
674 glioblastoma cell survival. *Neuro Oncol*, *19*(4), 524-534. doi:10.1093/neuonc/now233

- 675 Lei, L., Sonabend, A. M., Guarnieri, P., Soderquist, C., Ludwig, T., Rosenfeld, S., . . . Canoll, P.  
676 (2011). Glioblastoma models reveal the connection between adult glial progenitors and the  
677 proneural phenotype. *PLoS One*, 6(5), e20041. doi:10.1371/journal.pone.0020041
- 678 Li, H. (2011). A statistical framework for SNP calling, mutation discovery, association mapping  
679 and population genetical parameter estimation from sequencing data. *Bioinformatics*,  
680 27(21), 2987-2993. doi:10.1093/bioinformatics/btr509
- 681 Ligon, K. L., Huillard, E., Mehta, S., Kesari, S., Liu, H., Alberta, J. A., . . . Rowitch, D. H. (2007).  
682 Olig2-regulated lineage-restricted pathway controls replication competence in neural stem  
683 cells and malignant glioma. *Neuron*, 53(4), 503-517. doi:10.1016/j.neuron.2007.01.009
- 684 Lin, S. C., Lee, K. F., Nikitin, A. Y., Hilsenbeck, S. G., Cardiff, R. D., Li, A., . . . Lee, E. Y. (2004).  
685 Somatic mutation of p53 leads to estrogen receptor alpha-positive and -negative mouse  
686 mammary tumors with high frequency of metastasis. *Cancer Res*, 64(10), 3525-3532.  
687 doi:10.1158/0008-5472.CAN-03-3524
- 688 Love, M. I., Huber, W., & Anders, S. (2014). Moderated estimation of fold change and  
689 dispersion for RNA-seq data with DESeq2. *Genome Biol*, 15(12), 550.  
690 doi:10.1186/s13059-014-0550-8
- 691 Lu, F., Chen, Y., Zhao, C., Wang, H., He, D., Xu, L., . . . Lu, Q. R. (2016). Olig2-Dependent  
692 Reciprocal Shift in PDGF and EGF Receptor Signaling Regulates Tumor Phenotype and  
693 Mitotic Growth in Malignant Glioma. *Cancer Cell*, 29(5), 669-683.  
694 doi:10.1016/j.ccell.2016.03.027
- 695 Lu, Q. R., Sun, T., Zhu, Z., Ma, N., Garcia, M., Stiles, C. D., & Rowitch, D. H. (2002). Common  
696 developmental requirement for Olig function indicates a motor neuron/oligodendrocyte  
697 connection. *Cell*, 109(1), 75-86. Retrieved from  
698 [http://www.ncbi.nlm.nih.gov/entrez/query.fcgi?cmd=Retrieve&db=PubMed&dopt=Citation&](http://www.ncbi.nlm.nih.gov/entrez/query.fcgi?cmd=Retrieve&db=PubMed&dopt=Citation&list_uids=11955448)  
699 [list\\_uids=11955448](http://www.ncbi.nlm.nih.gov/entrez/query.fcgi?cmd=Retrieve&db=PubMed&dopt=Citation&list_uids=11955448)
- 700 Madisen, L., Zwingman, T. A., Sunkin, S. M., Oh, S. W., Zariwala, H. A., Gu, H., . . . Zeng, H.  
701 (2010). A robust and high-throughput Cre reporting and characterization system for the  
702 whole mouse brain. *Nat Neurosci*, 13(1), 133-140. doi:10.1038/nn.2467
- 703 Marian, C. O., Cho, S. K., McEllin, B. M., Maher, E. A., Hatanpaa, K. J., Madden, C.  
704 J., . . . Bachoo, R. M. (2010). The telomerase antagonist, imetelstat, efficiently targets  
705 glioblastoma tumor-initiating cells leading to decreased proliferation and tumor growth.  
706 *Clin Cancer Res*, 16(1), 154-163. doi:10.1158/1078-0432.CCR-09-2850
- 707 Marin-Valencia, I., Yang, C., Mashimo, T., Cho, S., Baek, H., Yang, X. L., . . . Bachoo, R. M.  
708 (2012). Analysis of tumor metabolism reveals mitochondrial glucose oxidation in  
709 genetically diverse human glioblastomas in the mouse brain in vivo. *Cell Metab*, 15(6),  
710 827-837. doi:10.1016/j.cmet.2012.05.001
- 711 McLean, C. Y., Bristor, D., Hiller, M., Clarke, S. L., Schaar, B. T., Lowe, C. B., . . . Bejerano, G.  
712 (2010). GREAT improves functional interpretation of cis-regulatory regions. *Nat*  
713 *Biotechnol*, 28(5), 495-501. doi:10.1038/nbt.1630
- 714 Mehta, S., Huillard, E., Kesari, S., Maire, C. L., Golebiowski, D., Harrington, E. P., . . . Stiles, C.  
715 D. (2011). The central nervous system-restricted transcription factor Olig2 opposes p53  
716 responses to genotoxic damage in neural progenitors and malignant glioma. *Cancer Cell*,  
717 19(3), 359-371. doi:10.1016/j.ccr.2011.01.035
- 718 Mori, T., Tanaka, K., Buffo, A., Wurst, W., Kuhn, R., & Gotz, M. (2006). Inducible gene deletion  
719 in astroglia and radial glia—a valuable tool for functional and lineage analysis. *Glia*, 54(1),  
720 21-34. doi:10.1002/glia.20350
- 721 Nakatani, H., Martin, E., Hassani, H., Clavairoly, A., Maire, C. L., Viadieu, A., . . . Parras, C.  
722 (2013). Ascl1/Mash1 Promotes Brain Oligodendrogenesis during Myelination and  
723 Remyelination. *J Neurosci*, 33(23), 9752-9768. doi:10.1523/JNEUROSCI.0805-13.2013
- 724 Ostrom, Q. T., Gittleman, H., Xu, J., Kromer, C., Wolinsky, Y., Kruchko, C., & Barnholtz-Sloan,  
725 J. S. (2016). CBTRUS Statistical Report: Primary Brain and Other Central Nervous

- 726 System Tumors Diagnosed in the United States in 2009-2013. *Neuro Oncol*, 18(suppl\_5),  
727 v1-v75. doi:10.1093/neuonc/now207
- 728 Pacary, E., Heng, J., Azzarelli, R., Riou, P., Castro, D., Lebel-Potter, M., . . . Guillemot, F.  
729 (2011). Proneural transcription factors regulate different steps of cortical neuron migration  
730 through Rnd-mediated inhibition of RhoA signaling. *Neuron*, 69(6), 1069-1084.  
731 doi:10.1016/j.neuron.2011.02.018
- 732 Parada, L. F., Dirks, P. B., & Wechsler-Reya, R. J. (2017). Brain Tumor Stem Cells Remain in  
733 Play. *J Clin Oncol*, 35(21), 2428-2431. doi:10.1200/JCO.2017.73.9540
- 734 Park, N. I., Guilhamon, P., Desai, K., McAdam, R. F., Langille, E., O'Connor, M., . . . Dirks, P. B.  
735 (2017). ASCL1 Reorganizes Chromatin to Direct Neuronal Fate and Suppress  
736 Tumorigenicity of Glioblastoma Stem Cells. *Cell Stem Cell*, 21(2), 209-224.e7.  
737 doi:10.1016/j.stem.2017.06.004
- 738 Parras, C. M., Galli, R., Britz, O., Soares, S., Galichet, C., Battiste, J., . . . Guillemot, F. (2004).  
739 Mash1 specifies neurons and oligodendrocytes in the postnatal brain. *EMBO J*, 23(22),  
740 4495-4505. doi:10.1038/sj.emboj.7600447
- 741 Parras, C. M., Hunt, C., Sugimori, M., Nakafuku, M., Rowitch, D., & Guillemot, F. (2007). The  
742 proneural gene Mash1 specifies an early population of telencephalic oligodendrocytes. *J*  
743 *Neurosci*, 27(16), 4233-4242. doi:10.1523/JNEUROSCI.0126-07.2007
- 744 Patel, A. P., Tirosh, I., Trombetta, J. J., Shalek, A. K., Gillespie, S. M., Wakimoto,  
745 H., . . . Bernstein, B. E. (2014). Single-cell RNA-seq highlights intratumoral heterogeneity  
746 in primary glioblastoma. *Science*, 344(6190), 1396-1401. doi:10.1126/science.1254257  
747 [doi]
- 748 Rapa, I., Volante, M., Migliore, C., Farsetti, A., Berruti, A., Vittorio Scagliotti, G., . . . Papotti, M.  
749 (2013). Human ASH-1 promotes neuroendocrine differentiation in androgen deprivation  
750 conditions and interferes with androgen responsiveness in prostate cancer cells. *Prostate*,  
751 73(11), 1241-1249. doi:10.1002/pros.22679
- 752 Raposo, A. A., Vasconcelos, F. F., Drechsel, D., Marie, C., Johnston, C., Dolle, D., . . . Castro,  
753 D. S. (2015). Ascl1 Coordinately Regulates Gene Expression and the Chromatin  
754 Landscape during Neurogenesis. *Cell Rep*. doi:10.1016/j.celrep.2015.02.025
- 755 Rheinbay, E., Suva, M. L., Gillespie, S. M., Wakimoto, H., Patel, A. P., Shahid,  
756 M., . . . Bernstein, B. E. (2013). An aberrant transcription factor network essential for Wnt  
757 signaling and stem cell maintenance in glioblastoma. *Cell Rep*, 3(5), 1567-1579.  
758 doi:10.1016/j.celrep.2013.04.021
- 759 Robinson, M. D., McCarthy, D. J., & Smyth, G. K. (2010). edgeR: a Bioconductor package for  
760 differential expression analysis of digital gene expression data. *Bioinformatics*, 26(1), 139-  
761 140. doi:10.1093/bioinformatics/btp616
- 762 Singh, D. K., Kollipara, R. K., Vemireddy, V., Yang, X. L., Sun, Y., Regmi, N., . . . Bachoo, R. M.  
763 (2017). Oncogenes Activate an Autonomous Transcriptional Regulatory Circuit That  
764 Drives Glioblastoma. *Cell Rep*, 18(4), 961-976. doi:10.1016/j.celrep.2016.12.064
- 765 Somasundaram, K., Reddy, S. P., Vinnakota, K., Britto, R., Subbarayan, M., Nambiar,  
766 S., . . . Rao, M. R. (2005). Upregulation of ASCL1 and inhibition of Notch signaling  
767 pathway characterize progressive astrocytoma. *Oncogene*, 24(47), 7073-7083.  
768 doi:10.1038/sj.onc.1208865
- 769 Sottoriva, A., Spiteri, I., Piccirillo, S. G., Touloumis, A., Collins, V. P., Marioni, J. C., . . . Tavaré,  
770 S. (2013). Intratumor heterogeneity in human glioblastoma reflects cancer evolutionary  
771 dynamics. *Proc Natl Acad Sci U S A*, 110(10), 4009-4014. doi:10.1073/pnas.1219747110
- 772 Srinivas, S., Watanabe, T., Lin, C. S., William, C. M., Tanabe, Y., Jessell, T. M., & Costantini, F.  
773 (2001). Cre reporter strains produced by targeted insertion of EYFP and ECFP into the  
774 ROSA26 locus. *BMC Dev Biol*, 1, 4. Retrieved from  
775 [http://www.ncbi.nlm.nih.gov/entrez/query.fcgi?cmd=Retrieve&db=PubMed&dopt=Citation&](http://www.ncbi.nlm.nih.gov/entrez/query.fcgi?cmd=Retrieve&db=PubMed&dopt=Citation&list_uids=11299042)  
776 [list\\_uids=11299042](http://www.ncbi.nlm.nih.gov/entrez/query.fcgi?cmd=Retrieve&db=PubMed&dopt=Citation&list_uids=11299042)

- 777 Subramanian, A., Tamayo, P., Mootha, V. K., Mukherjee, S., Ebert, B. L., Gillette, M.  
778 A., . . . Mesirov, J. P. (2005). Gene set enrichment analysis: a knowledge-based approach  
779 for interpreting genome-wide expression profiles. *Proc Natl Acad Sci U S A*, *102*(43),  
780 15545-15550. doi:10.1073/pnas.0506580102
- 781 Sugimori, M., Nagao, M., Bertrand, N., Parras, C. M., Guillemot, F., & Nakafuku, M. (2007).  
782 Combinatorial actions of patterning and HLH transcription factors in the spatiotemporal  
783 control of neurogenesis and gliogenesis in the developing spinal cord. *Development*,  
784 *134*(8), 1617-1629. doi:10.1242/dev.001255
- 785 Sugimori, M., Nagao, M., Parras, C. M., Nakatani, H., Lebel, M., Guillemot, F., & Nakafuku, M.  
786 (2008). *Ascl1* is required for oligodendrocyte development in the spinal cord.  
787 *Development*, *135*(7), 1271-1281. doi:10.1242/dev.015370
- 788 Suva, M. L., Rheinbay, E., Gillespie, S. M., Patel, A. P., Wakimoto, H., Rabkin, S.  
789 D., . . . Bernstein, B. E. (2014). Reconstructing and reprogramming the tumor-propagating  
790 potential of glioblastoma stem-like cells. *Cell*, *157*(3), 580-594.  
791 doi:10.1016/j.cell.2014.02.030
- 792 Ueno, T., Ito, J., Hoshikawa, S., Ohori, Y., Fujiwara, S., Yamamoto, S., . . . Ogata, T. (2012).  
793 The identification of transcriptional targets of *Ascl1* in oligodendrocyte development. *Glia*,  
794 *60*(10), 1495-1505. doi:10.1002/glia.22369
- 795 Verhaak, R. G., Hoadley, K. A., Purdom, E., Wang, V., Qi, Y., Wilkerson, M. D., . . . Hayes, D.  
796 N. (2010). Integrated genomic analysis identifies clinically relevant subtypes of  
797 glioblastoma characterized by abnormalities in PDGFRA, IDH1, EGFR, and NF1. *Cancer*  
798 *Cell*, *17*(1), 98-110. doi:10.1016/j.ccr.2009.12.020
- 799 Vias, M., Massie, C. E., East, P., Scott, H., Warren, A., Zhou, Z., . . . Mills, I. G. (2008). Pro-  
800 neural transcription factors as cancer markers. *BMC Med Genomics*, *1*, 17.  
801 doi:10.1186/1755-8794-1-17
- 802 Vue, T. Y., Kim, E. J., Parras, C. M., Guillemot, F., & Johnson, J. E. (2014). *Ascl1* controls the  
803 number and distribution of astrocytes and oligodendrocytes in the gray matter and white  
804 matter of the spinal cord. *Development*, *141*(19), 3721-3731. doi:10.1242/dev.105270
- 805 Zhang, W., Girard, L., Zhang, Y. A., Haruki, T., Papari-Zareei, M., Stastny, V., . . . Gazdar, A. F.  
806 (2018). Small cell lung cancer tumors and preclinical models display heterogeneity of  
807 neuroendocrine phenotypes. *Transl Lung Cancer Res*, *7*(1), 32-49.  
808 doi:10.21037/tlcr.2018.02.02
- 809 Zhang, Y., Chen, K., Sloan, S. A., Bennett, M. L., Scholze, A. R., O'Keeffe, S., . . . Wu, J. Q.  
810 (2014). An RNA-sequencing transcriptome and splicing database of glia, neurons, and  
811 vascular cells of the cerebral cortex. *J Neurosci*, *34*(36), 11929-11947.  
812 doi:10.1523/JNEUROSCI.1860-14.2014
- 813 Zhou, Q., Choi, G., & Anderson, D. J. (2001). The bHLH transcription factor *Olig2* promotes  
814 oligodendrocyte differentiation in collaboration with *Nkx2.2*. *Neuron*, *31*(5), 791-807.  
815 Retrieved from  
816 [http://www.ncbi.nlm.nih.gov/entrez/query.fcgi?cmd=Retrieve&db=PubMed&dopt=Citation&](http://www.ncbi.nlm.nih.gov/entrez/query.fcgi?cmd=Retrieve&db=PubMed&dopt=Citation&list_uids=11567617)  
817 [list\\_uids=11567617](http://www.ncbi.nlm.nih.gov/entrez/query.fcgi?cmd=Retrieve&db=PubMed&dopt=Citation&list_uids=11567617)
- 818 Zhu, Y., Guignard, F., Zhao, D., Liu, L., Burns, D. K., Mason, R. P., . . . Parada, L. F. (2005).  
819 Early inactivation of p53 tumor suppressor gene cooperating with NF1 loss induces  
820 malignant astrocytoma. *Cancer Cell*, *8*(2), 119-130. doi:10.1016/j.ccr.2005.07.004
- 821 Zhu, Y., Romero, M. I., Ghosh, P., Ye, Z., Charnay, P., Rushing, E. J., . . . Parada, L. F. (2001).  
822 Ablation of NF1 function in neurons induces abnormal development of cerebral cortex and  
823 reactive gliosis in the brain. *Genes Dev*, *15*(7), 859-876. doi:10.1101/gad.862101
- 824

825

826 **FIGURES & LEGENDS**

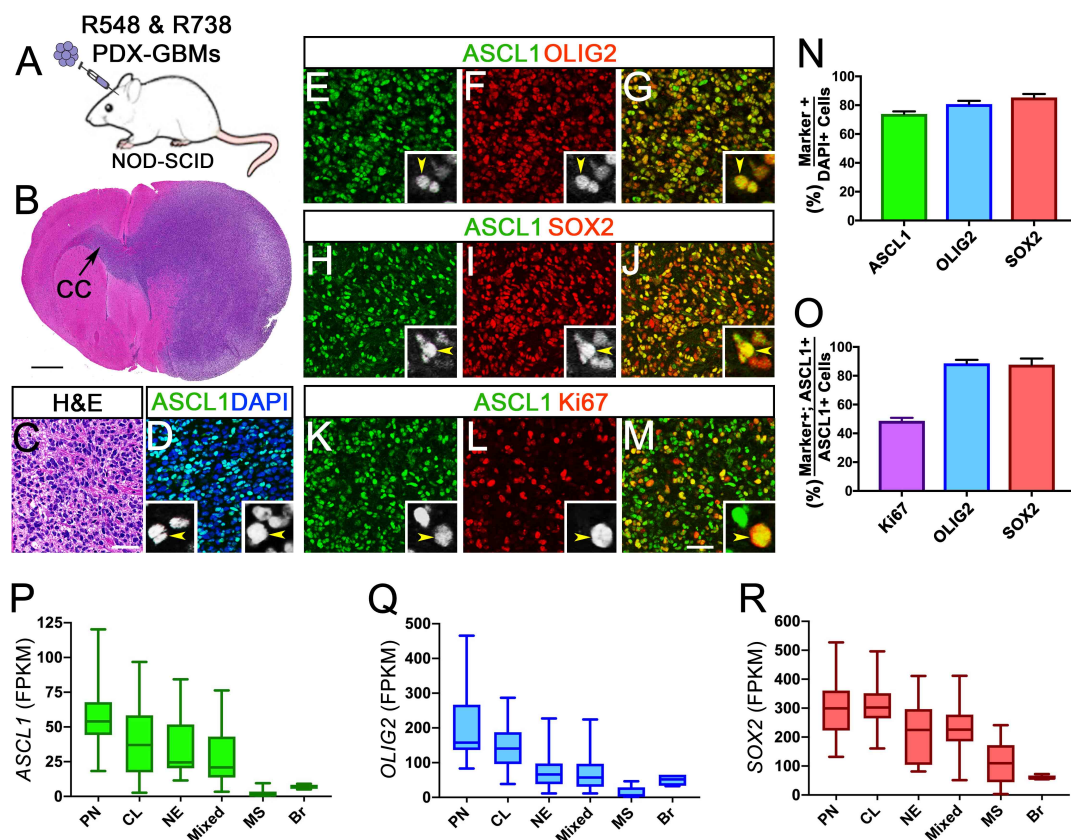

827

828 **Figure 1. Neurodevelopmental transcription factors ASCL1, OLIG2, and SOX2 are highly**  
 829 **expressed in the majority of GBMs.**

830 **(A)** Schematic of PDX-GBMs (R548 and R738) grown orthotopically in the brains of NOD-SCID  
 831 mice.

832 **(B,C)** H&E staining showing tumor is a high-grade glioma and is migrating across the corpus  
 833 callosum (CC).

834 **(D-M)** Immunofluorescence showing co-expression of ASCL1 with OLIG2 (E-G), and  
 835 SOX2 (H-J), and Ki67 (K-M) in the PDX-GBMs.

836 **(N,O)** Quantification of the percentage of DAPI+ tumor cells that are ASCL1+, OLIG2+, or SOX2+  
 837 (N), and the percentage of ASCL1+ tumor cells that are also Ki67+, OLIG2+, or SOX2+ (O). N=4  
 838 PDX-GBM.

839 **(P-R)** Box whisker plot of RNA-seq data from 160 TCGA Primary GBMs and 5 normal brain  
 840 samples (Brennan et al, 2013) demonstrating that ASCL1 (P), OLIG2 (Q), and SOX2 (R) are  
 841 highly expressed in the majority of GBM subtypes but are low in MS subtype and normal brain  
 842 (Br). GBM subtype was determined using the 840 GBM Subtype Signature Genes (Verhaak et al,  
 843 2010). PN-proneural, MS-mesenchymal, CL-classical, NE-neural. Mixed GBM subtype express  
 844 multiple subtype signatures.

845 Scale bar is 1 mm for B and 50  $\mu$ m for C-M, and 12.5  $\mu$ m for all insets in D-M.

846

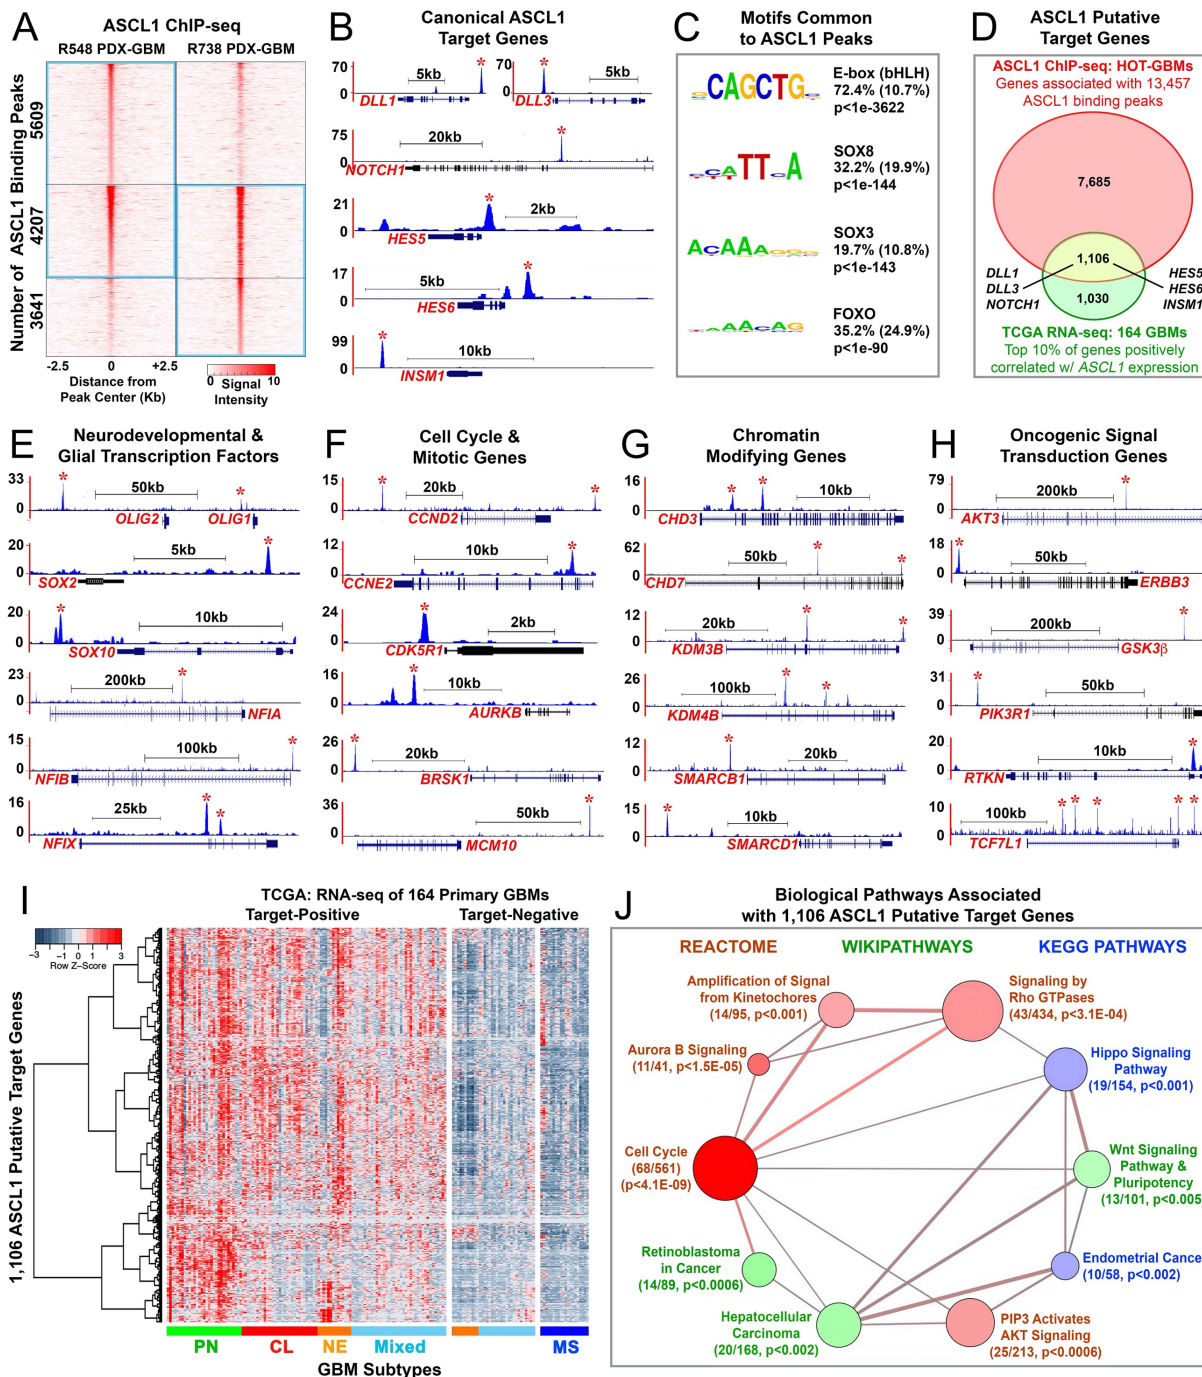

847

848 **Figure 2. ASCL1 binds to target genes in GBMs involved in glial development, cell cycle**  
849 **progression, and cancer.**

850 **(A)** Heatmap of ASCL1 ChIP-seq signal intensity  $\pm 2.5$  kb around 13,457 combined peaks  
851 identified in the genome of the PDX-GBMs. Blue rectangles indicate statistically significant peaks  
852 called by Homer. See Supplemental Table S1 for genomic coordinates of the ASCL1 binding  
853 sites.

854 **(B)** ChIP-seq tracks of genomic regions surrounding canonical ASCL1 target genes *DLL1*, *DLL3*,  
855 *NOTCH1*, *HES5*, *HES6*, and *INSM1*. Asterisks indicate ASCL1 binding peaks meeting statistical  
856 criteria.

857 **(C)** *De novo* motif analysis shows enrichment of bHLH E-box, SOX, and FOXO motifs directly  
858 beneath ASCL1 binding peaks.

859 **(D)** Venn diagram intersecting genes (8,791, red oval) associated with ASCL1 binding peaks in  
860 the PDX-GBMs with the top 10% of genes (2,136, green oval) positively correlated (Spearman  
861  $\text{corr} < 0.4$ ) with *ASCL1* expression using RNA-seq data of 164 TCGA GBM samples (Supplemental  
862 Table S2). The overlap of 1,106 genes (yellow area) defines ASCL1 target genes, which included  
863 all the canonical ASCL1 target genes.

864 **(E-H)** ChIP-seq tracks of ASCL1 binding peaks at loci of neurodevelopmental and glial  
865 transcription factors (E), cell cycle & mitotic genes (F), chromatin modifying genes (G), and  
866 oncogenic signaling pathway genes (H).

867 **(I)** Heatmap and dendrogram illustrating relative expression of 1,106 ASCL1 putative target genes  
868 in GBM subtypes using RNA-seq of 164 TCGA primary GBM samples (Brennan et al, 2013). Note  
869 that ASCL1 target-positive GBMs include all subtypes except mesenchymal, while ASCL1 target-  
870 negative GBMs include all mesenchymal and some neural and mixed GBM subtypes.

871 **(J)** Gene set over-representation analysis of 1,106 ASCL1 putative-target genes using  
872 ConsensusPathDB ([cpdb.molgen.mpg.de](http://cpdb.molgen.mpg.de)). Biologically relevant enriched pathways are  
873 illustrated. Size of circle indicates the number of genes per pathway, size of edge indicates degree  
874 of gene overlaps between the pathways, and color indicates database sources. The number of  
875 ASCL1 putative-target genes over-represented in each pathway, and respective p-value are  
876 indicated. See Supplement Table S3 for complete gene set over-representation analysis.  
877

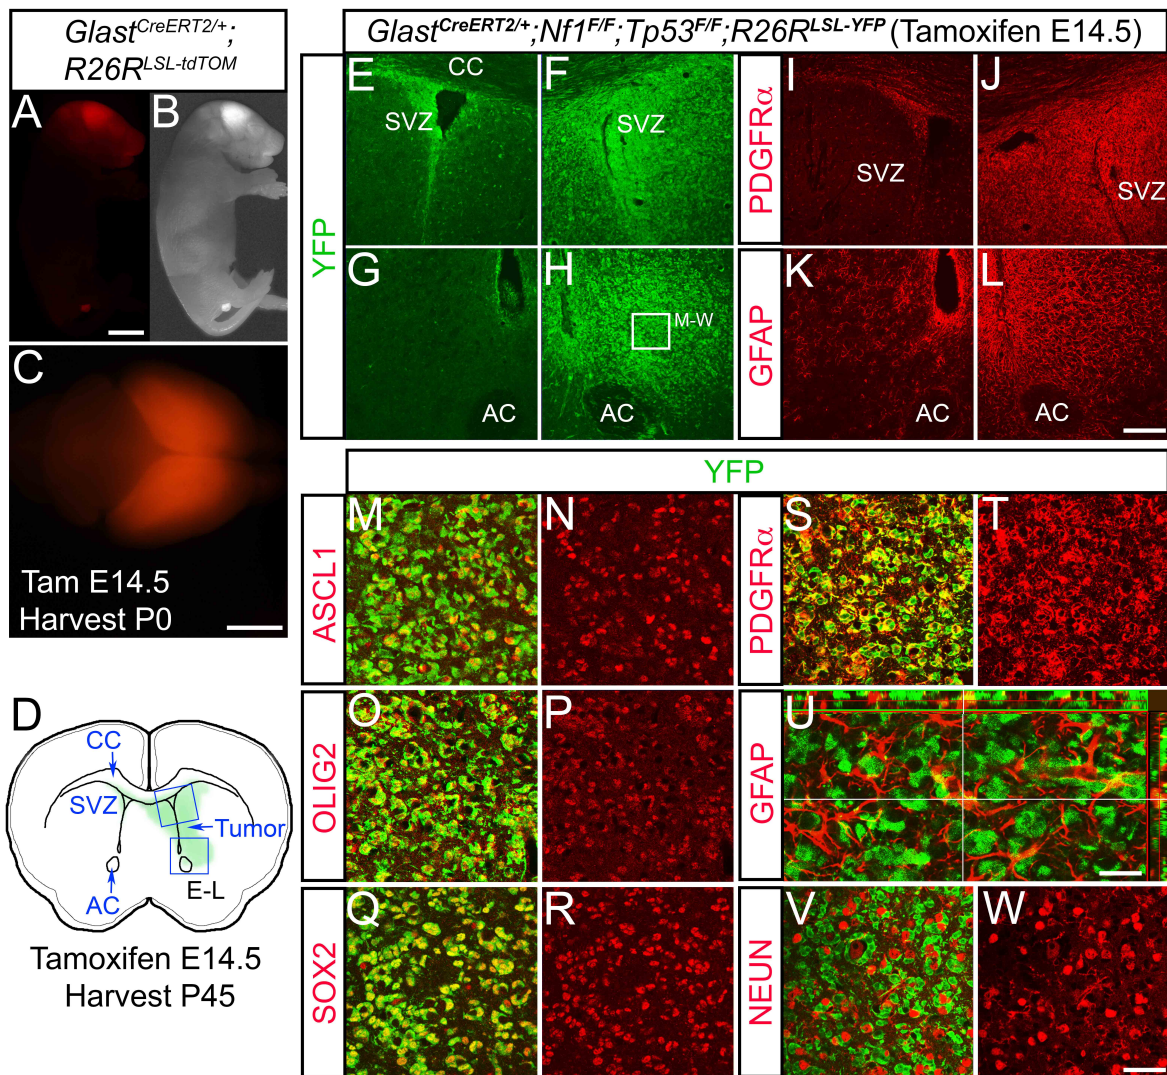

878

879 **Figure 3. ASCL1, OLIG2, and SOX2 are highly expressed in early stage tumor cells of the**  
 880 **glioma mouse model.**

881 **(A-C)** A neonatal pup from *Glast<sup>CreERT2/+</sup>* crossed with *R26R<sup>LSL-tdTomato</sup>* reporter administered with  
 882 tamoxifen at E14.5. Note that tdTomato fluorescence is specific to the CNS and highest in the  
 883 cerebral cortex (A,C).

884 **(D)** Schematic of an early stage brain a tumor in the right subventricular zone (SVZ) of a  
 885 *Glast<sup>CreERT2/+</sup>; Nf1<sup>F/F</sup>; Tp53<sup>F/F</sup>; R26R<sup>LSL-YFP</sup>* mouse, administered with tamoxifen at E14.5 and harvested at  
 886 P45.

887 **(E-L)** Immunofluorescence shows high YFP reporter expression (E-H), OPC marker PDGFR $\alpha$   
 888 (I,J) and astrocyte marker GFAP (K,L) in tumor areas indicated in D.

889 **(M-W)** Higher magnification of tumor area indicated in H showing ASCL1 (M,N), OLIG2 (O,P),  
 890 SOX2 (Q,R), and PDGFR $\alpha$  (S,T) co-localized with YFP in tumor cells, but not GFAP (U) or the  
 891 neuronal marker NEUN (V,W).

892 Scale bar is 5 mm for A,B; 3 mm for C; 100  $\mu$ m for E-L; 25  $\mu$ m for M-T,V,W; and 12.5  $\mu$ m for U.



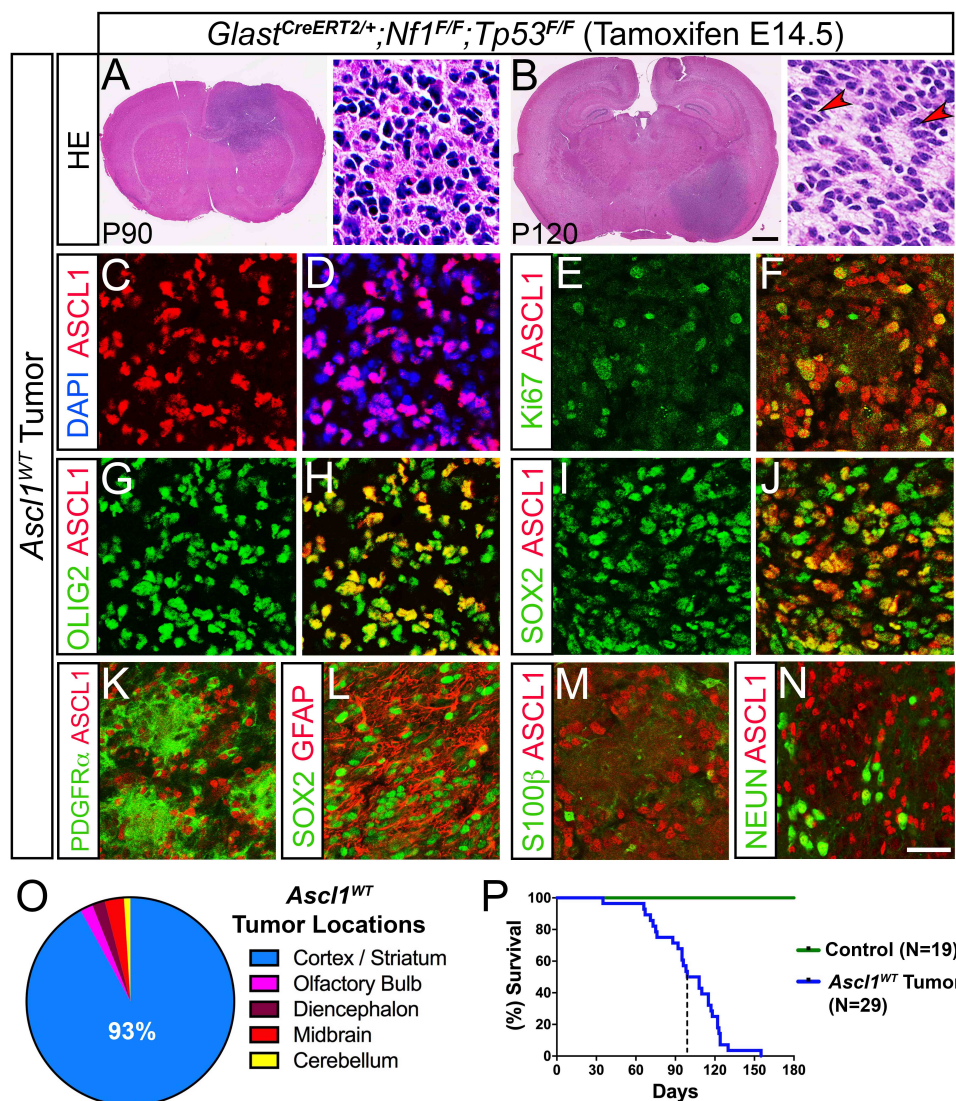

893

894 **Figure 4. Expression of ASCL1, OLIG2, and SOX2 are maintained in mice with terminal**  
 895 **stage glioma tumors.**

896 **(A,B)** H&E staining of *Ascl1*<sup>WT</sup> terminal stage tumors harvested at P90 and P120. Higher  
 897 magnification insets show that tumors are high-grade gliomas. Arrowheads indicate  
 898 pseudopalisading cellular features consistent with GBM.

899 **(C-N)** Immunofluorescence of *Ascl1*<sup>WT</sup> GBM tumor tissue. ASCL1 is present in the majority of  
 900 DAPI+ tumor cells (C,D) and co-localizes with Ki67 (E,F), OLIG2 (G,H), and SOX2 (I,J). PDGFR $\alpha$   
 901 (K) and GFAP (L) are also co-expressed in ASCL1+ or SOX2+ tumor cells respectively, but not  
 902 S100 $\beta$  (M) and NEUN (N).

903 **(O)** Incidence of tumors observed in different brain regions is indicated. Over 90% of tumors are  
 904 found in the cortex and striatum (N=29).

905 **(P)** Survival curve of *Ascl1*<sup>WT</sup> tumor (N=29) bearing mice and Cre-negative control mice (N=19).  
 906 Dotted line indicates median survival of 102 days for *Ascl1*<sup>WT</sup> tumor mice.

907 Scale bar is 1 mm for whole brain section and 30  $\mu$ m for insets of A,B; and 25  $\mu$ m for C-N.

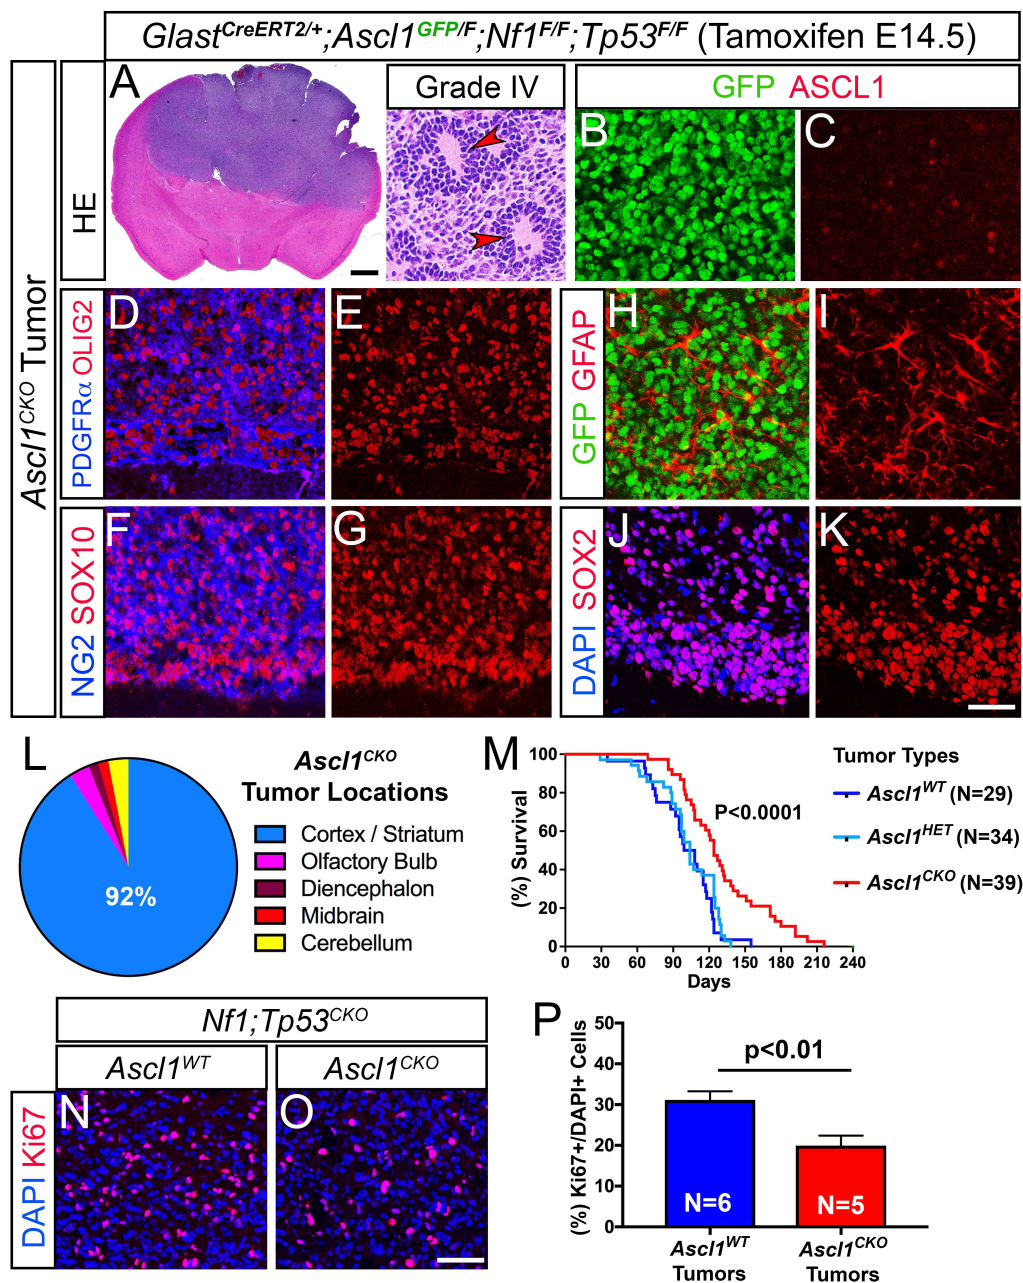

908

909 **Figure 5. Survival of glioma tumor bearing mice is increased in the absence of ASCL1.**

910 **(A)** H&E staining of an *Ascl1<sup>CKO</sup>* tumor exhibiting pseudopalisading cellular features of Grade IV  
911 glioma (arrowheads, insets).

912 **(B-K)** Immunofluorescence of *Ascl1<sup>CKO</sup>* tumor. GFP, driven by an *Ascl1<sup>GFP</sup>* knock-in allele, is  
913 present in tumor cells but ASCL1 is absent (B,C), indicating efficient deletion of *Ascl1<sup>Floxed</sup>* allele.  
914 Expression of OLIG2 & PDGFR $\alpha$  (D,E), SOX10 & NG2 (F,G), GFAP (H,I) and SOX2 (J,K) are  
915 unaffected.

916 **(L)** Incidence of *Ascl1<sup>CKO</sup>* tumors observed in the different brain regions. Over 90% of tumors are  
917 found in the cortex and striatum area similar to *Ascl1<sup>WT</sup>* tumors.

918 **(M)** Survival curve of *Ascl1*<sup>CKO</sup> versus *Ascl1*<sup>HET</sup> tumor mice. Median survival is significantly  
919 improved for *Ascl1*<sup>CKO</sup> (122 days) compared to *Ascl1*<sup>HET</sup> (104 days) tumor mice (dotted lines).  
920 Note that survival of *Ascl1*<sup>HET</sup> is very similar to *Ascl1*<sup>WT</sup> tumor mice (see Fig. 5P).

921 **(N-P)** Immunofluorescence (N,O) and quantification of the percentage of Ki67+/DAPI+ tumor cells  
922 (P) for *Ascl1*<sup>WT</sup> and *Ascl1*<sup>CKO</sup> tumors.

923 Scale bar is 1 mm for whole brain section and 30  $\mu$ m for insets of A; 25  $\mu$ m for B-K; and 50  $\mu$ m  
924 for N,O.

925

926

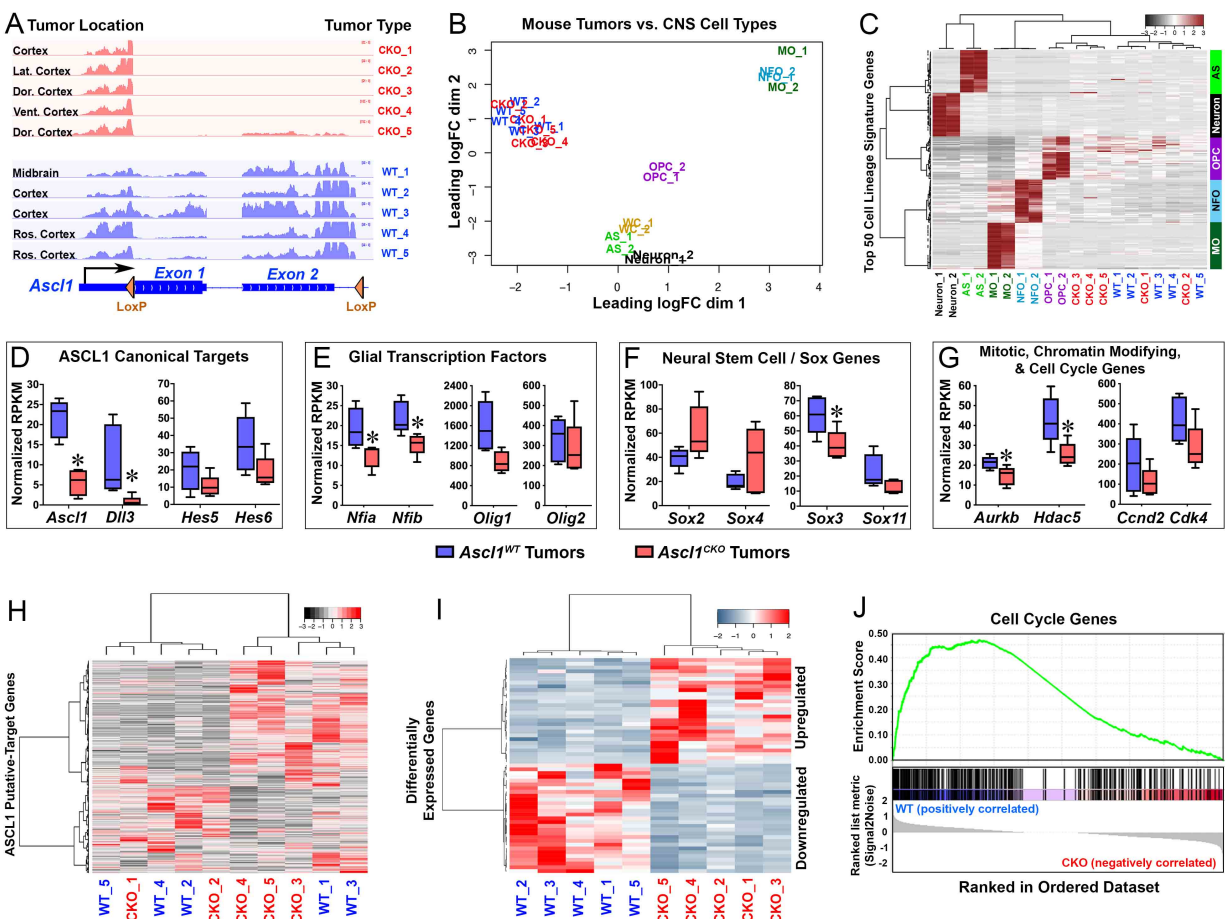

927

928 **Figure 6. Cell cycle genes are down-regulated in *Ascl1*<sup>CKO</sup> glioma tumors of the mouse**  
 929 **model.**

930 **(A)** RNA-seq tracks at the *Ascl1* locus of *Ascl1*<sup>WT</sup> and *Ascl1*<sup>CKO</sup> tumors isolated from brain regions  
 931 indicated. Note that Exon 1 and 2 of the *Ascl1* mRNA, flanked by Lox P sites, are absent in  
 932 *Ascl1*<sup>CKO</sup> tumors.

933 **(B)** Multidimensional scaling (MDS) plot of RNA-seq of *Ascl1*<sup>WT</sup> and *Ascl1*<sup>CKO</sup> tumors versus CNS  
 934 cell types (Zhang et al, 2014). *Ascl1*<sup>WT</sup> and *Ascl1*<sup>CKO</sup> tumors are more similar to each other than  
 935 to any of the CNS cell types. AS – astrocytes; OPC – oligodendrocyte precursor cells; NFO –  
 936 newly formed oligodendrocytes; MO – myelinating oligodendrocytes; WC – whole cortex.

937 **(C)** Heatmap and dendrograms using the top 50 CNS cell lineage signature genes for each cell  
 938 type (Zhang et al, 2014). Dendrograms on top show that *Ascl1*<sup>WT</sup> and *Ascl1*<sup>CKO</sup> tumors express  
 939 signature genes that are more similar to OPCs than to the other CNS cell types.

940 **(D-G)** Box and whisker plots of ASCL1 putative-target genes in *Ascl1*<sup>WT</sup> and *Ascl1*<sup>CKO</sup> tumors.  
 941 Canonical targets of ASCL1 (E), glial transcription factors (G), and mitotic, chromatin modifying,  
 942 and cell cycle genes (H) are expressed at lower level while Sox genes (F) are bidirectionally  
 943 affected in *Ascl1*<sup>CKO</sup> compared to *Ascl1*<sup>WT</sup> tumors. Asterisks indicate target genes significantly  
 944 altered (P<0.05, Wilcox test).

945 **(H,I)** Heatmap and dendrograms of differentially expressed genes (DEGs) in *Ascl1<sup>WT</sup>* and  
946 *Ascl1<sup>CKO</sup>* GBMs. ASCL1 putative direct targets that are upregulated or downregulated (I,  
947 Supplementary Table S5) and 57 ASCL1 indirect target DEGs (FDR<0.05) were identified (J,  
948 Supplementary Table S6).

949 **(J)** Gene-set-enrichment-analysis (GSEA) showing that cell cycle genes are enriched in the  
950 downregulated genes in *Ascl1<sup>CKO</sup>* compared to *Ascl1<sup>WT</sup>* tumors.

951

952

953

954 **SUPPLEMENTARY FIGURES & TABLES**

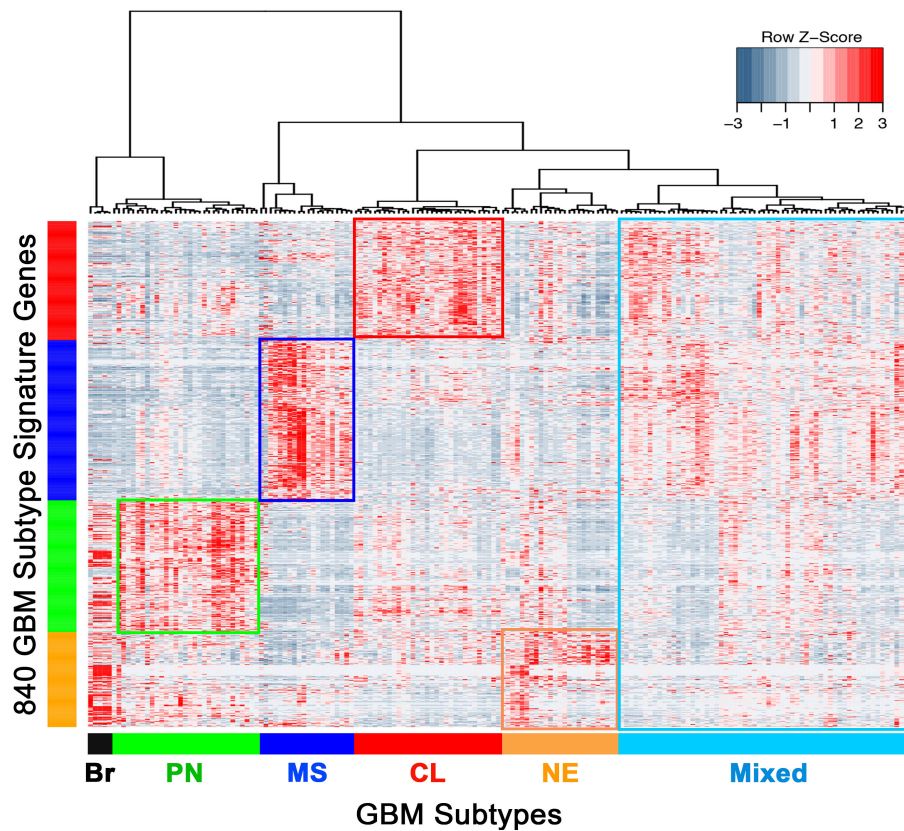

955

956 **Figure S1. Subtype identities of primary GBMs using RNA-seq.** RNA-seq data of 164 TCGA  
957 Primary GBMs and 5 normal brain samples (Brennan et al, 2013). Heatmap and dendrogram  
958 using the 840 GBM Subtype Signature Genes (Verhaak et al, 2010) reveals the presence  
959 (rectangles) of four previously identified GBM subtypes (PN-proneural, MS-mesenchymal, CL-  
960 classical, NE-neural) as well as Mixed GBM group which express multiple subtype signatures (P).

961

962 **Table S1: ChIP-seq coordinates of ASCL1 binding sites in PDX-GBMs**

963 **Table S2: ASCL1 putative target genes (Venn Diagrams in Figure 2D)**

964 **Table S3: ConsensusPathDB Analysis: Complete list of gene sets enriched in ASCL1**  
965 **putative target genes (include biological pathway terms and the genes in each selected**  
966 **pathways) (Diagram in Figure 2J)**

967 **Table S4: Expression of ASCL1 putative target genes in mouse *Ascl1*<sup>WT</sup> and *Ascl1*<sup>CKO</sup>**  
968 **tumors (Figure 6H)**

969 **Table S6: List of differentially expressed genes in mouse *Ascl1*<sup>WT</sup> and *Ascl1*<sup>CKO</sup> tumors**  
970 **(Figure 6I)**

971

972
